# Supplementary material for: Synthesis, Structure, Carbohydrate Enzyme Inhibition, Antioxidant Activity, In Silico Drug-Receptor Interactions and Drug-Like Profiling of the 5-Styryl-2-Aminochalcone Hybrids
Source: MDPI journal article supplement (doi:10.3390/molecules26092692), 2021-05-04

# Synthesis, Structure, Carbohydrate Enzyme Inhibition, Antioxidant Activity, In Silico Drug-Receptor Interactions and Drug-Like Profiling of the 5-Styryl-2-Aminochalcone Hybrids

Malose J. Mphahlele <sup>1,\*</sup>, Emmanuel Ndubuisi Agbo <sup>1</sup> and Yee Siew Choong <sup>2,\*</sup>

**Figure S1:** Copies of <sup>1</sup>H- and <sup>13</sup>C NMR spectra of the test compounds

**Figure S2:** Copies of IR spectra of the test compounds

**Figure S3.** The interactions of compounds **2c**, **2d**, **3a**, **3c**, **3d**, **3f** and **3h** against  $\alpha$ -glucosidase.

**Figure S4.** The interactions of compounds **2c**, **2d**, **3a**, **3c**, **3d**, **3f** and **3h** against  $\alpha$ -amylase.

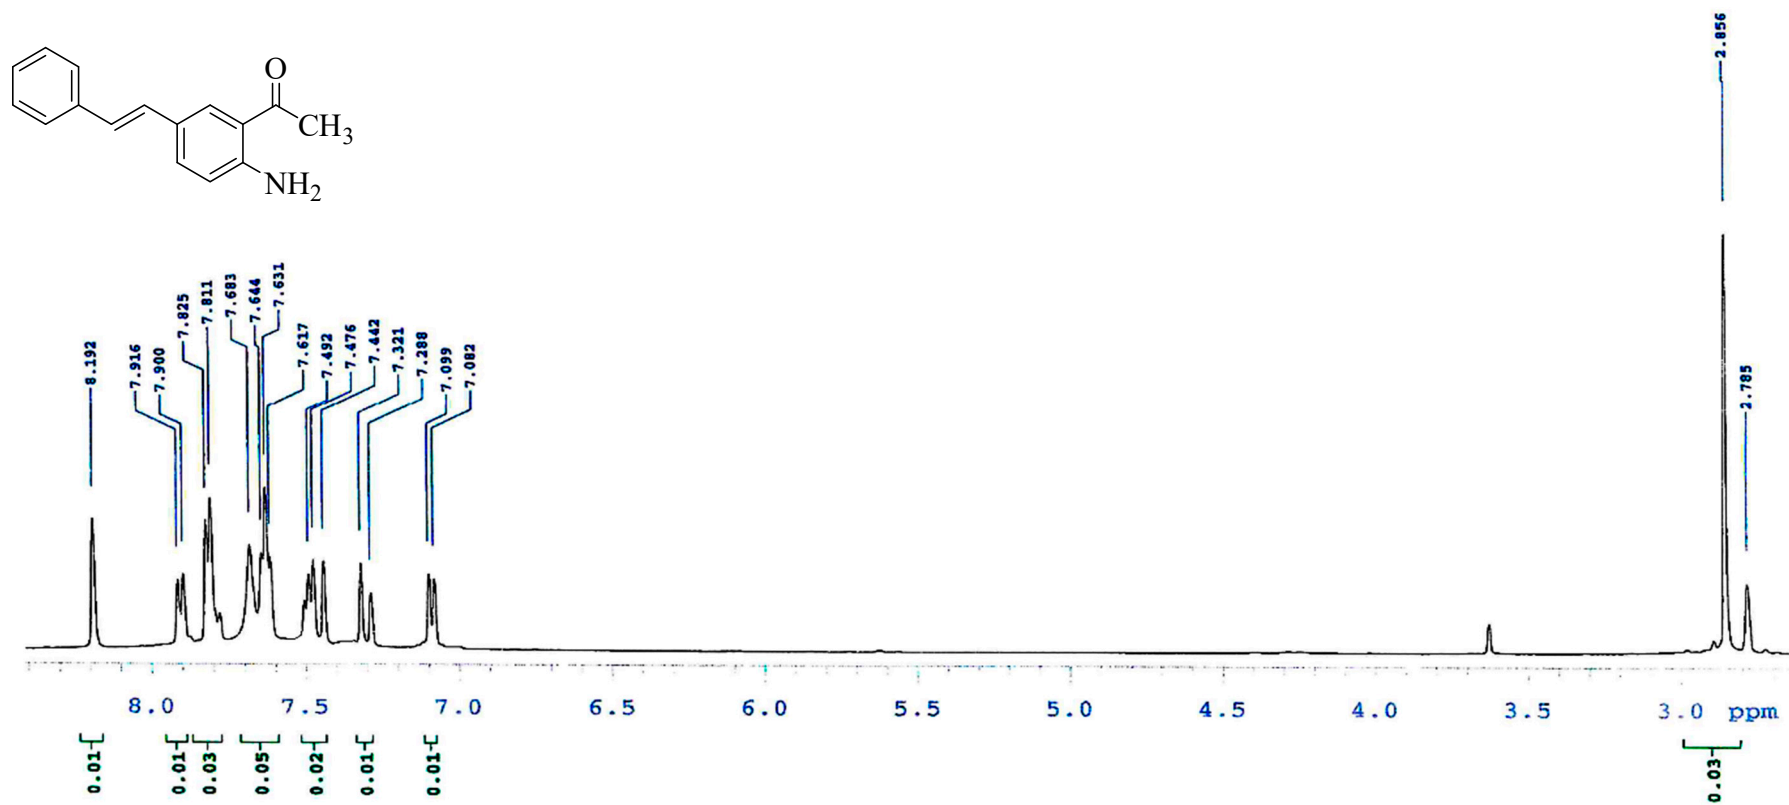

(a)

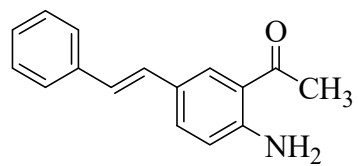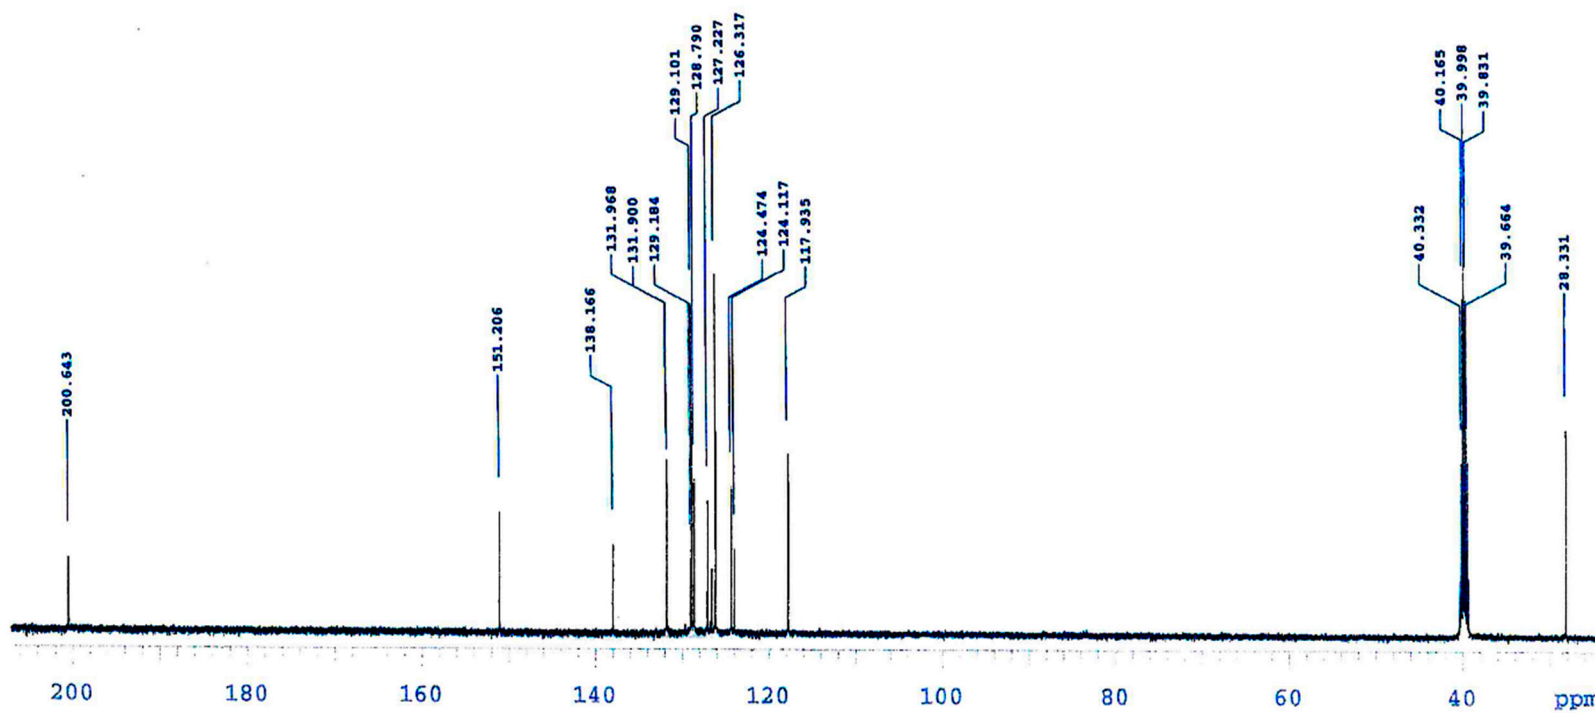

(b)

**Figure S1.1:** <sup>1</sup>H- and <sup>13</sup>C-NMR spectra of **2a** in DMSO-*d*<sub>6</sub> at 500 MHz (a) and 125 MHz (b), respectively.

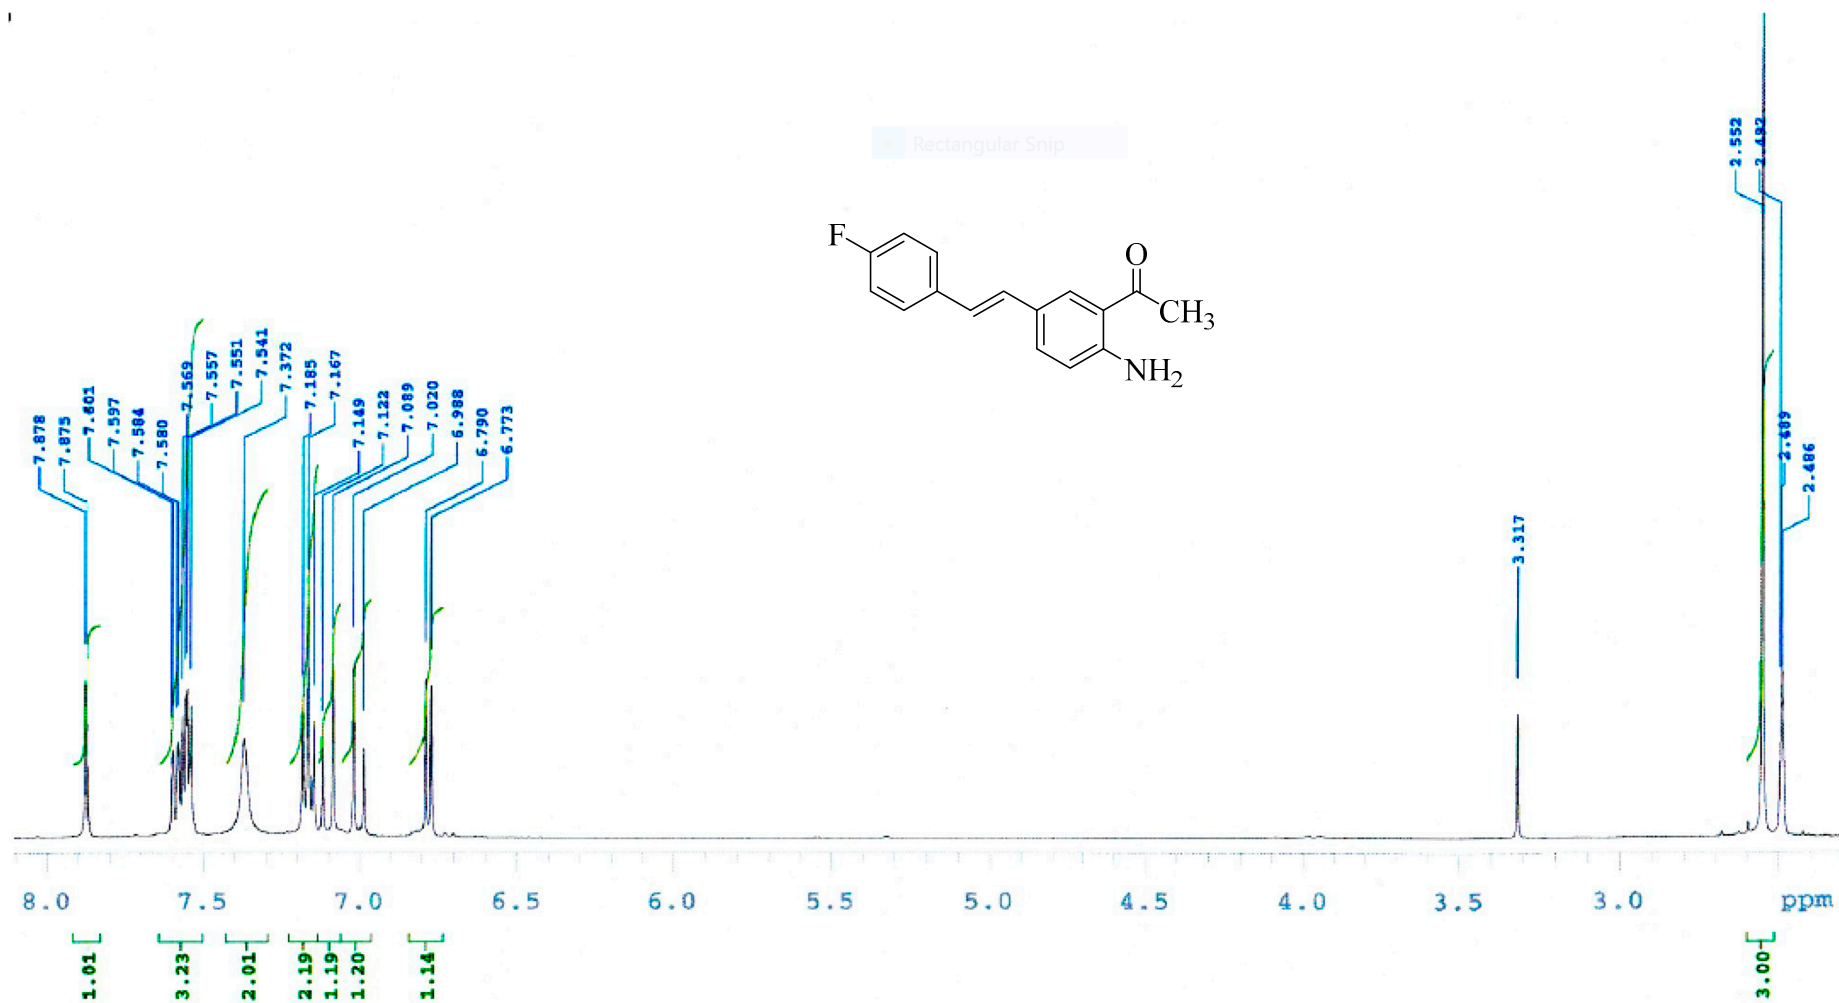

(a)



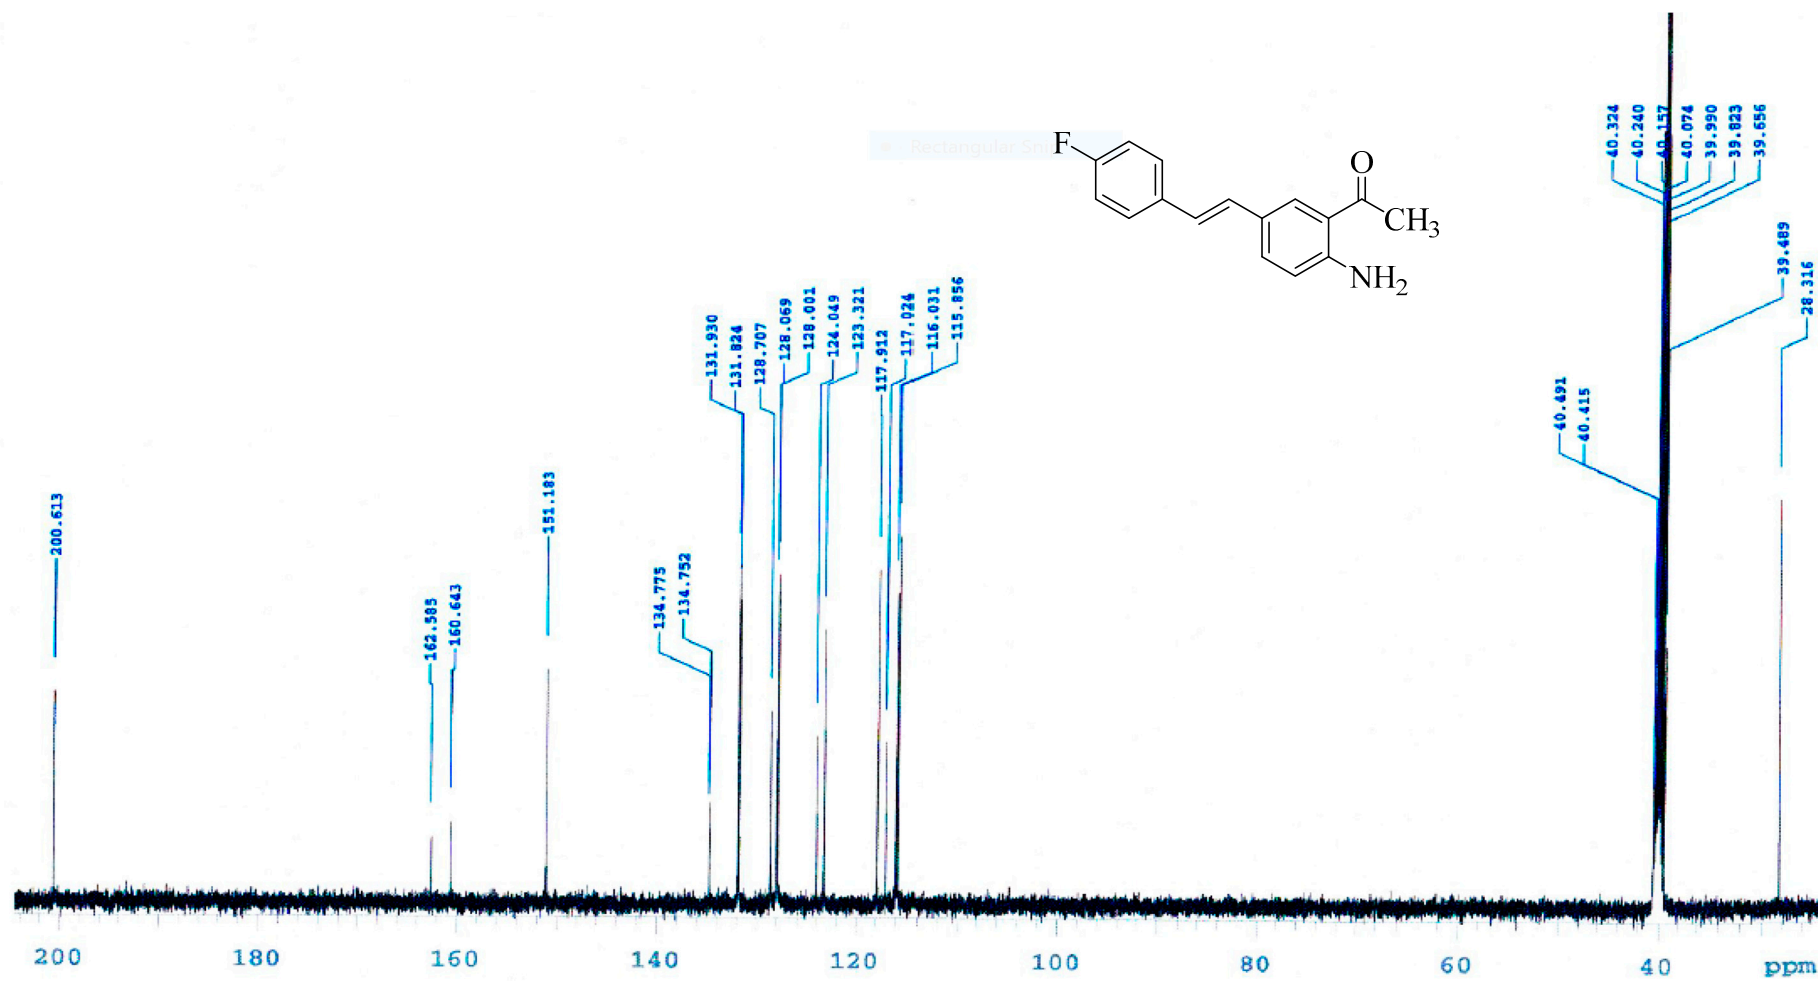

(b)

Figure S1.2: <sup>1</sup>H- and <sup>13</sup>C-NMR spectra of **2b** in DMSO-*d*<sub>6</sub> at 500 MHz (a) and 125 MHz (b), respectively.

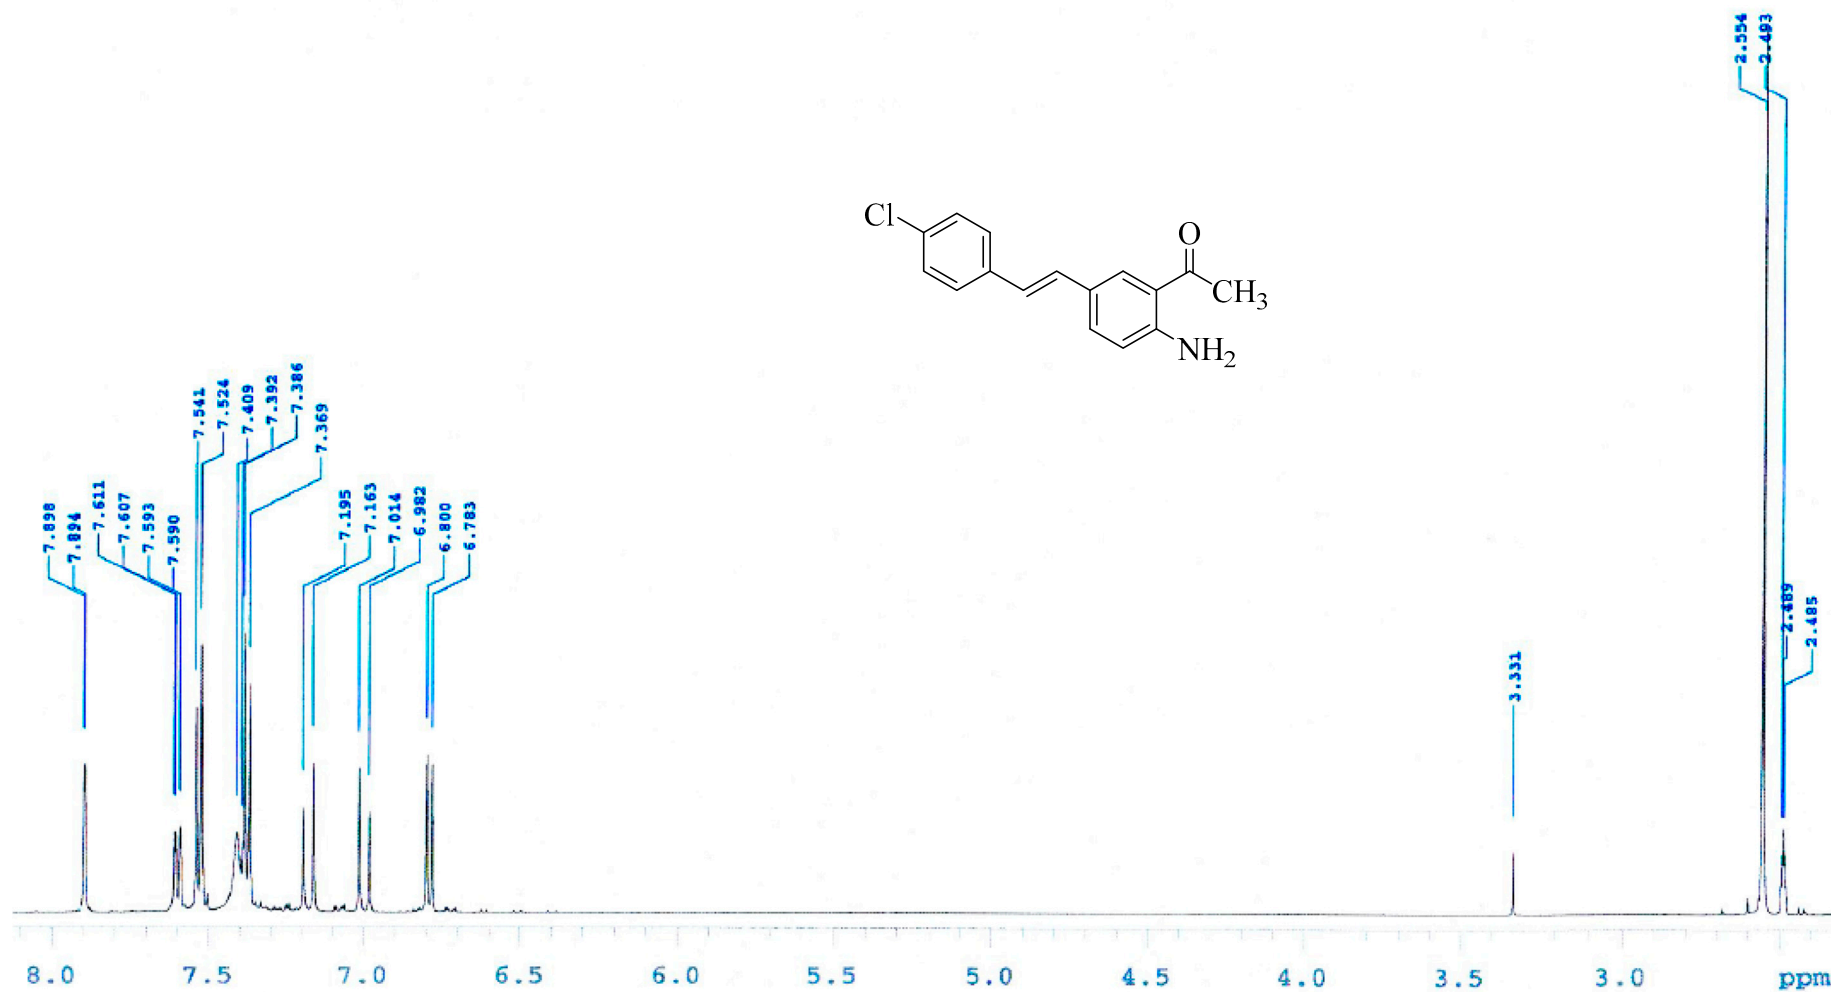

(a)

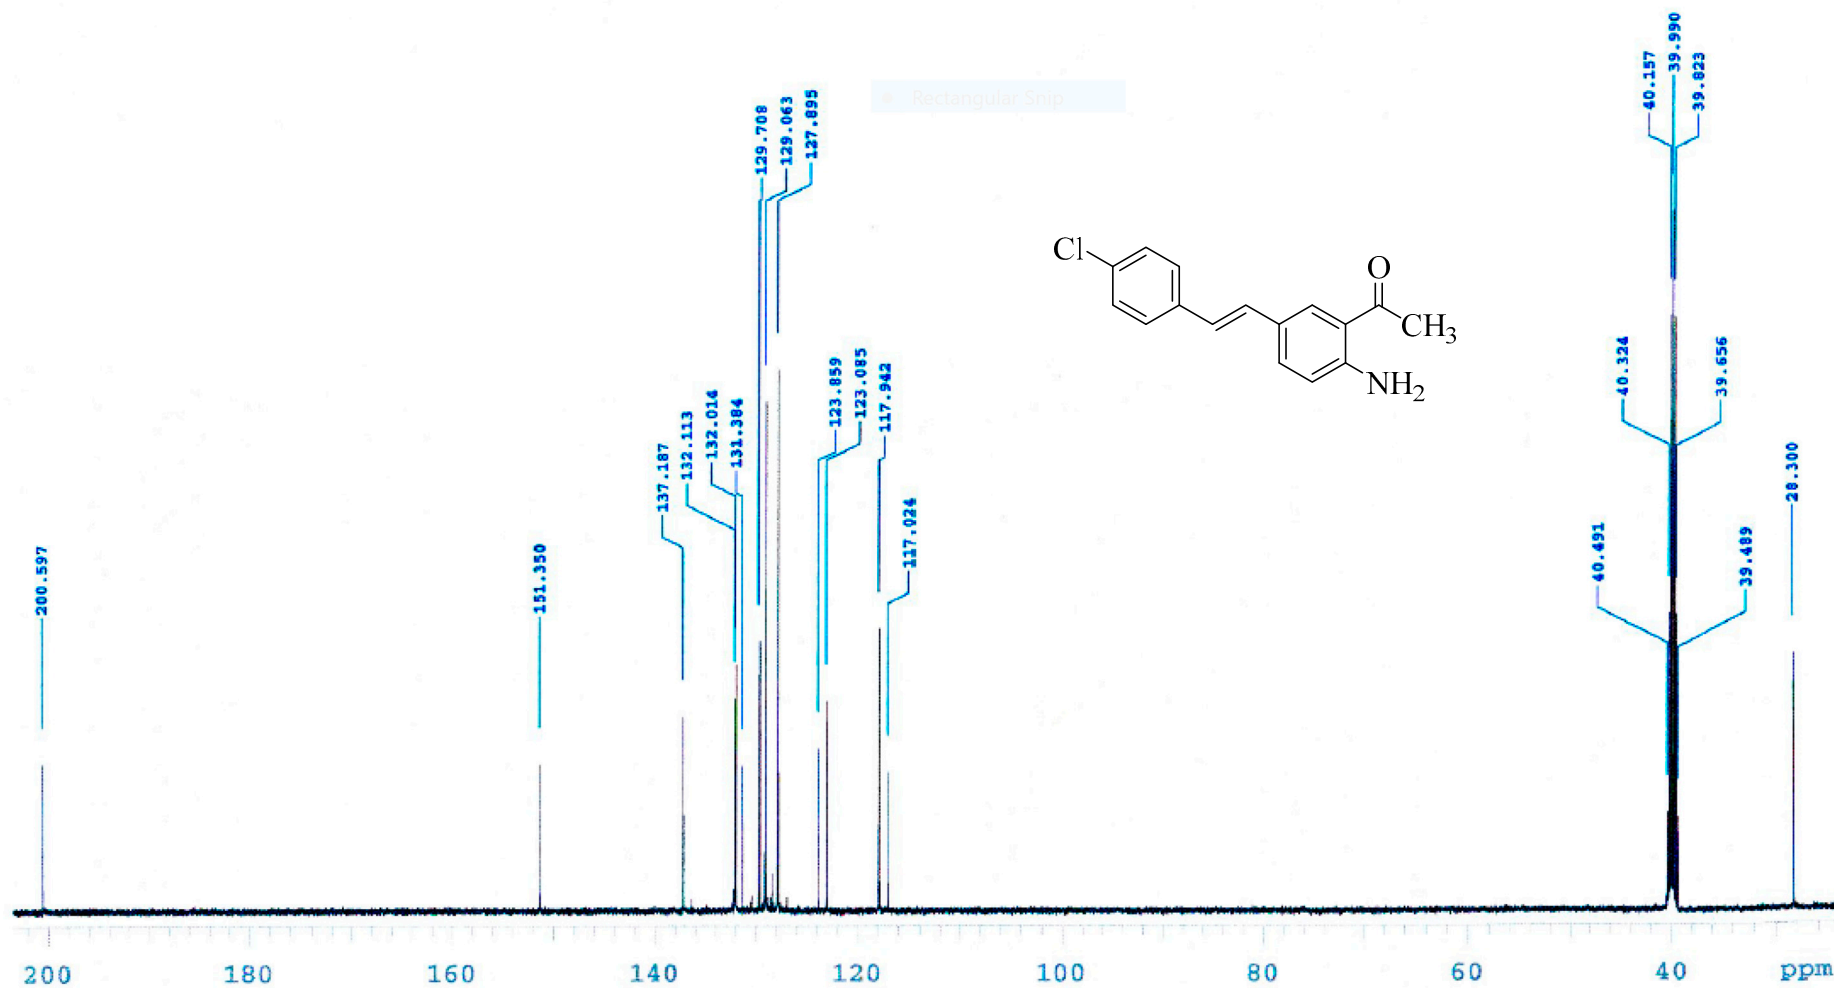

(b)

Figure S1.3: <sup>1</sup>H- and <sup>13</sup>C-NMR spectra of 2c in DMSO-*d*<sub>6</sub> at 500 MHz (a) and 125 MHz (b), respectively.

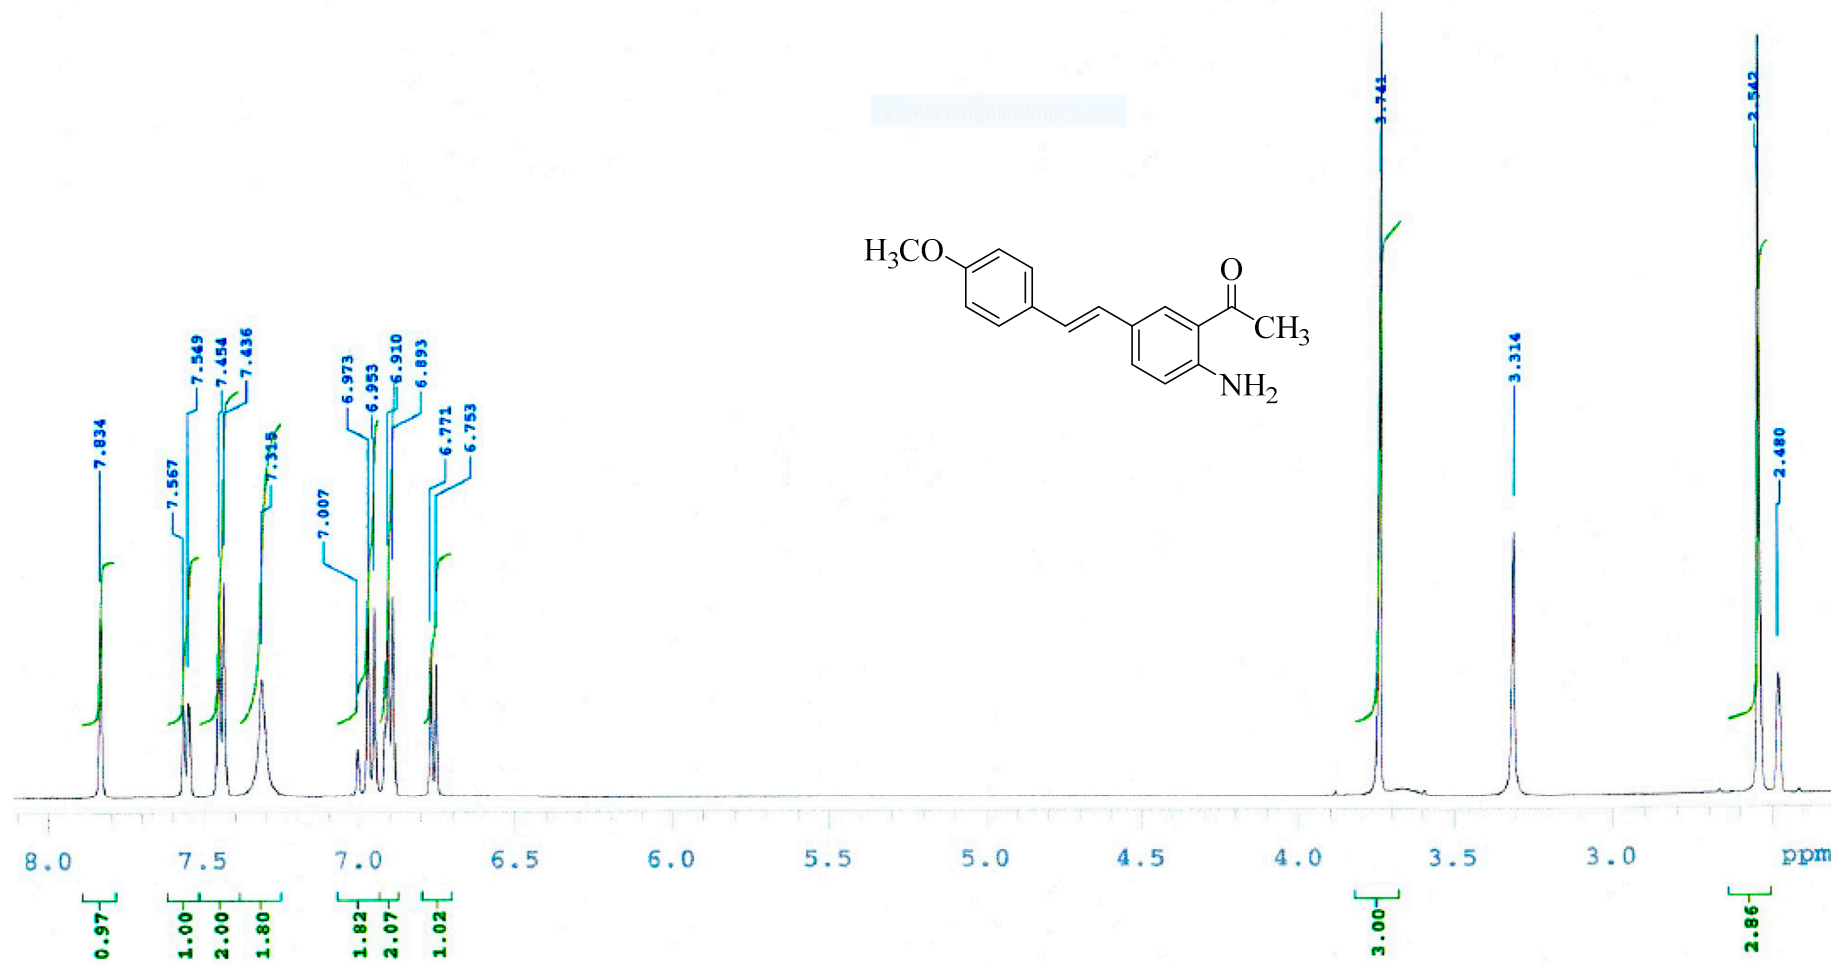

(a)

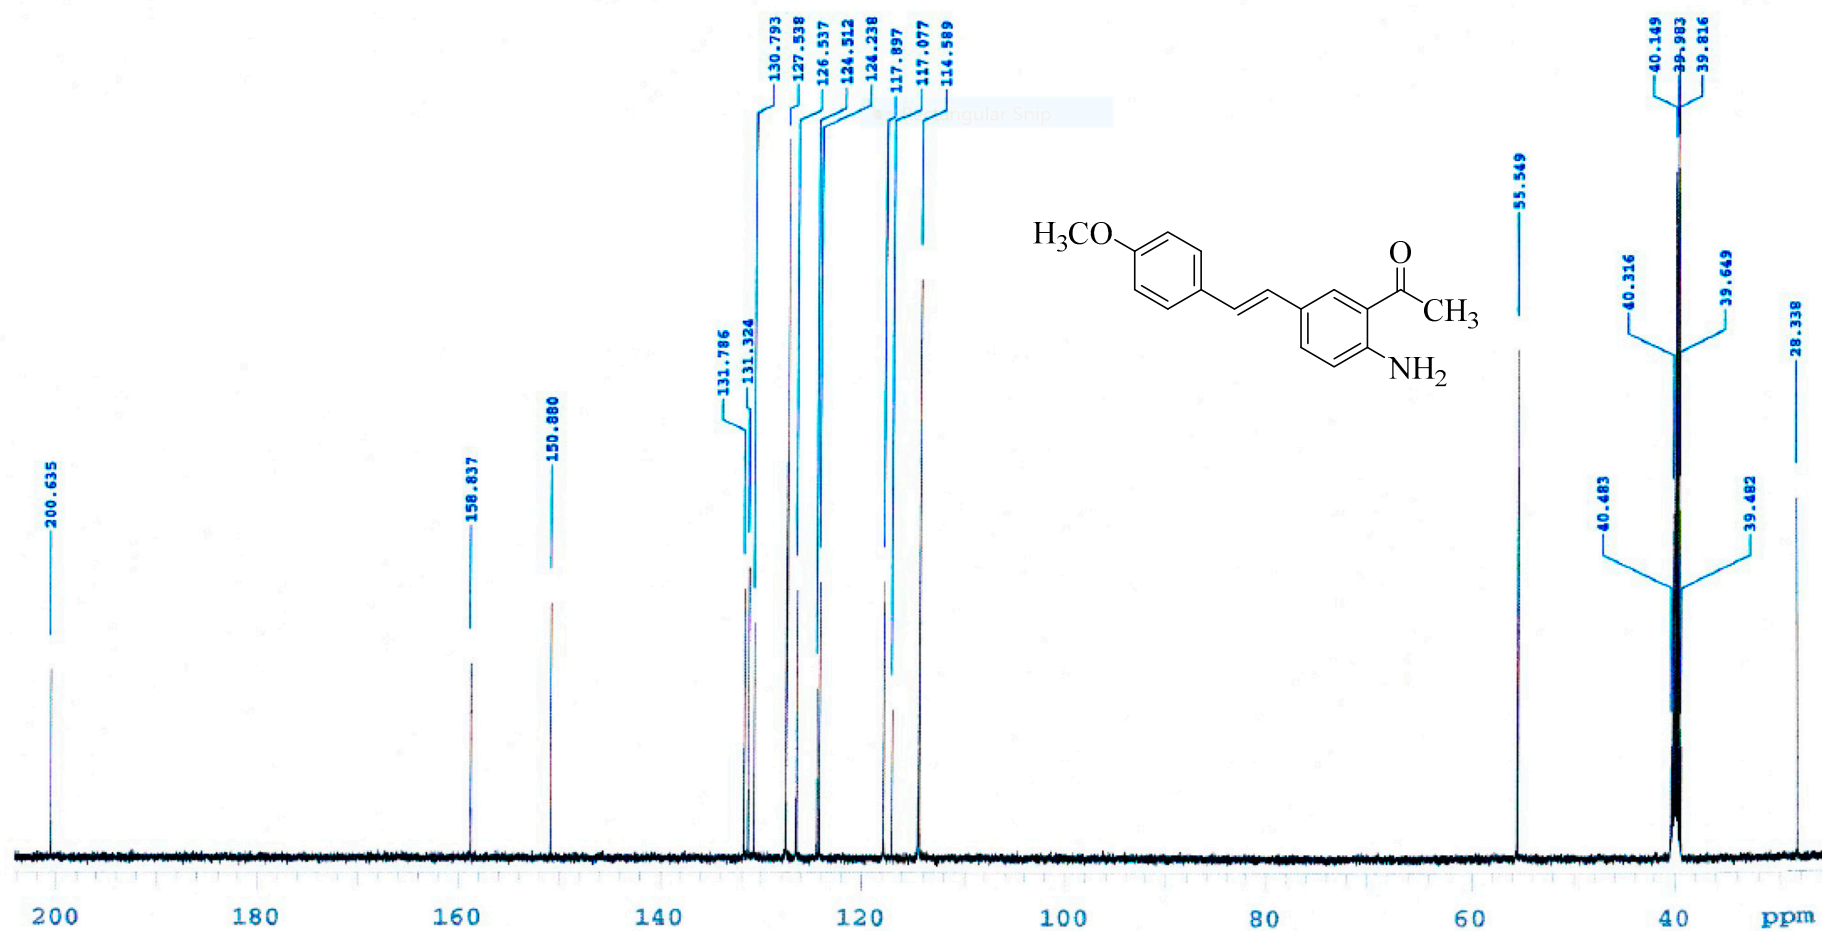

(b)

Figure S1.4: <sup>1</sup>H- and <sup>13</sup>C-NMR spectra of 2d in DMSO-*d*<sub>6</sub> at 500 MHz (a) and 125 MHz (b), respectively.

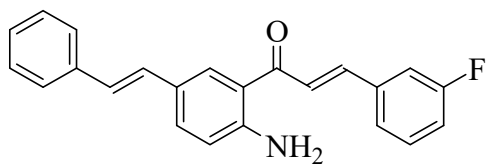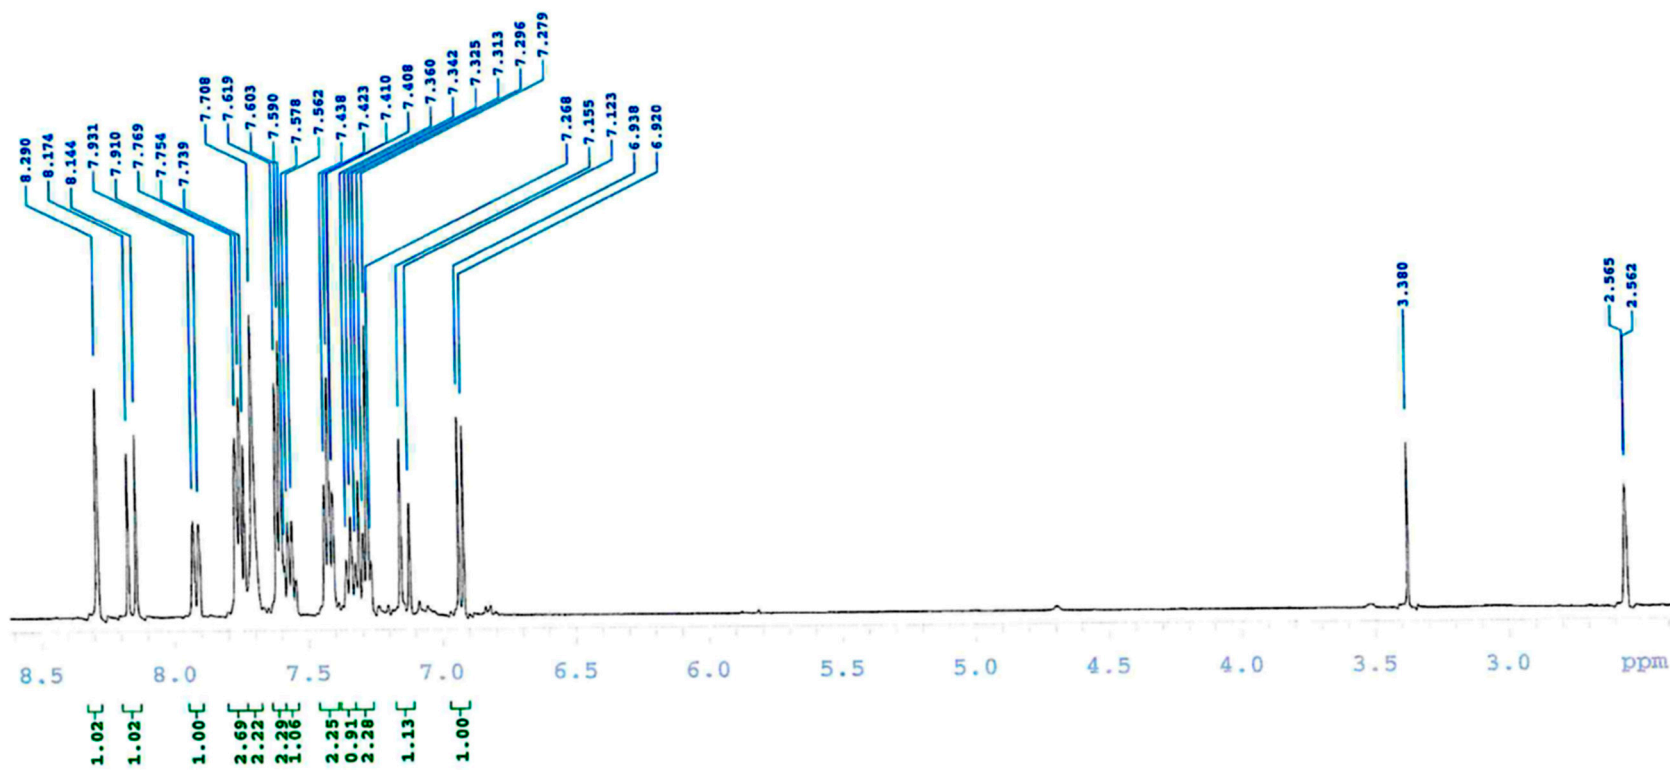

(a)

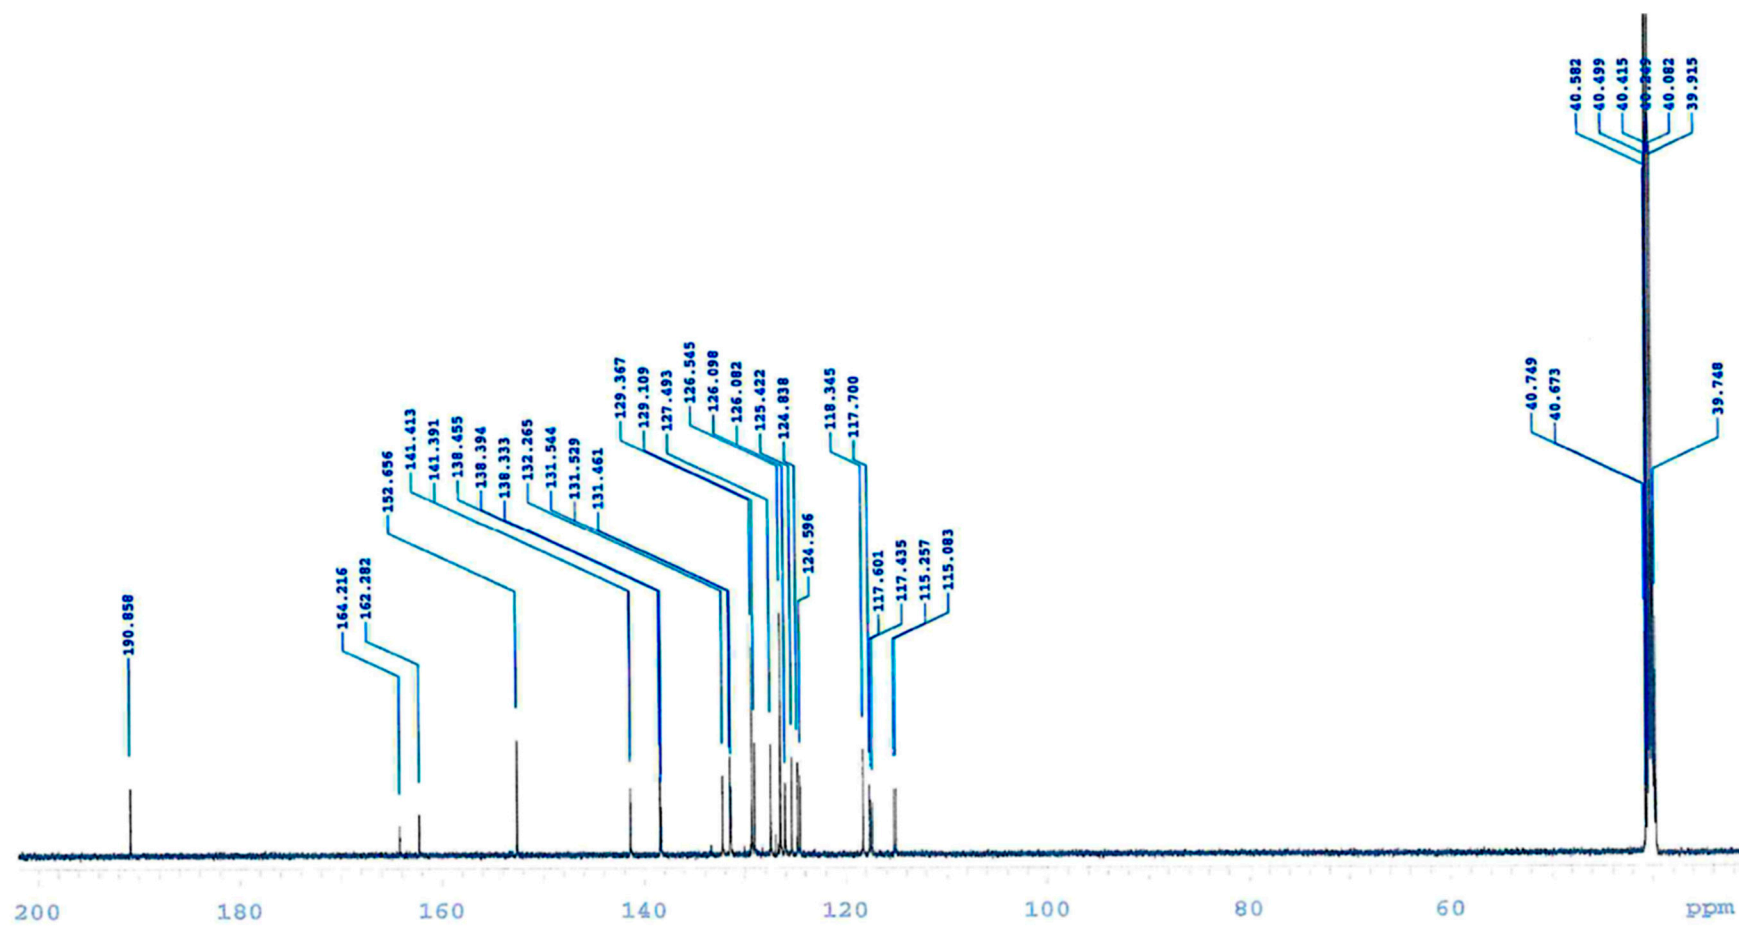

(b)

Figure S1.5: <sup>1</sup>H- and <sup>13</sup>C-NMR spectra of **3a** in DMSO-*d*<sub>6</sub> at 500 MHz (a) and 125 MHz (b), respectively.

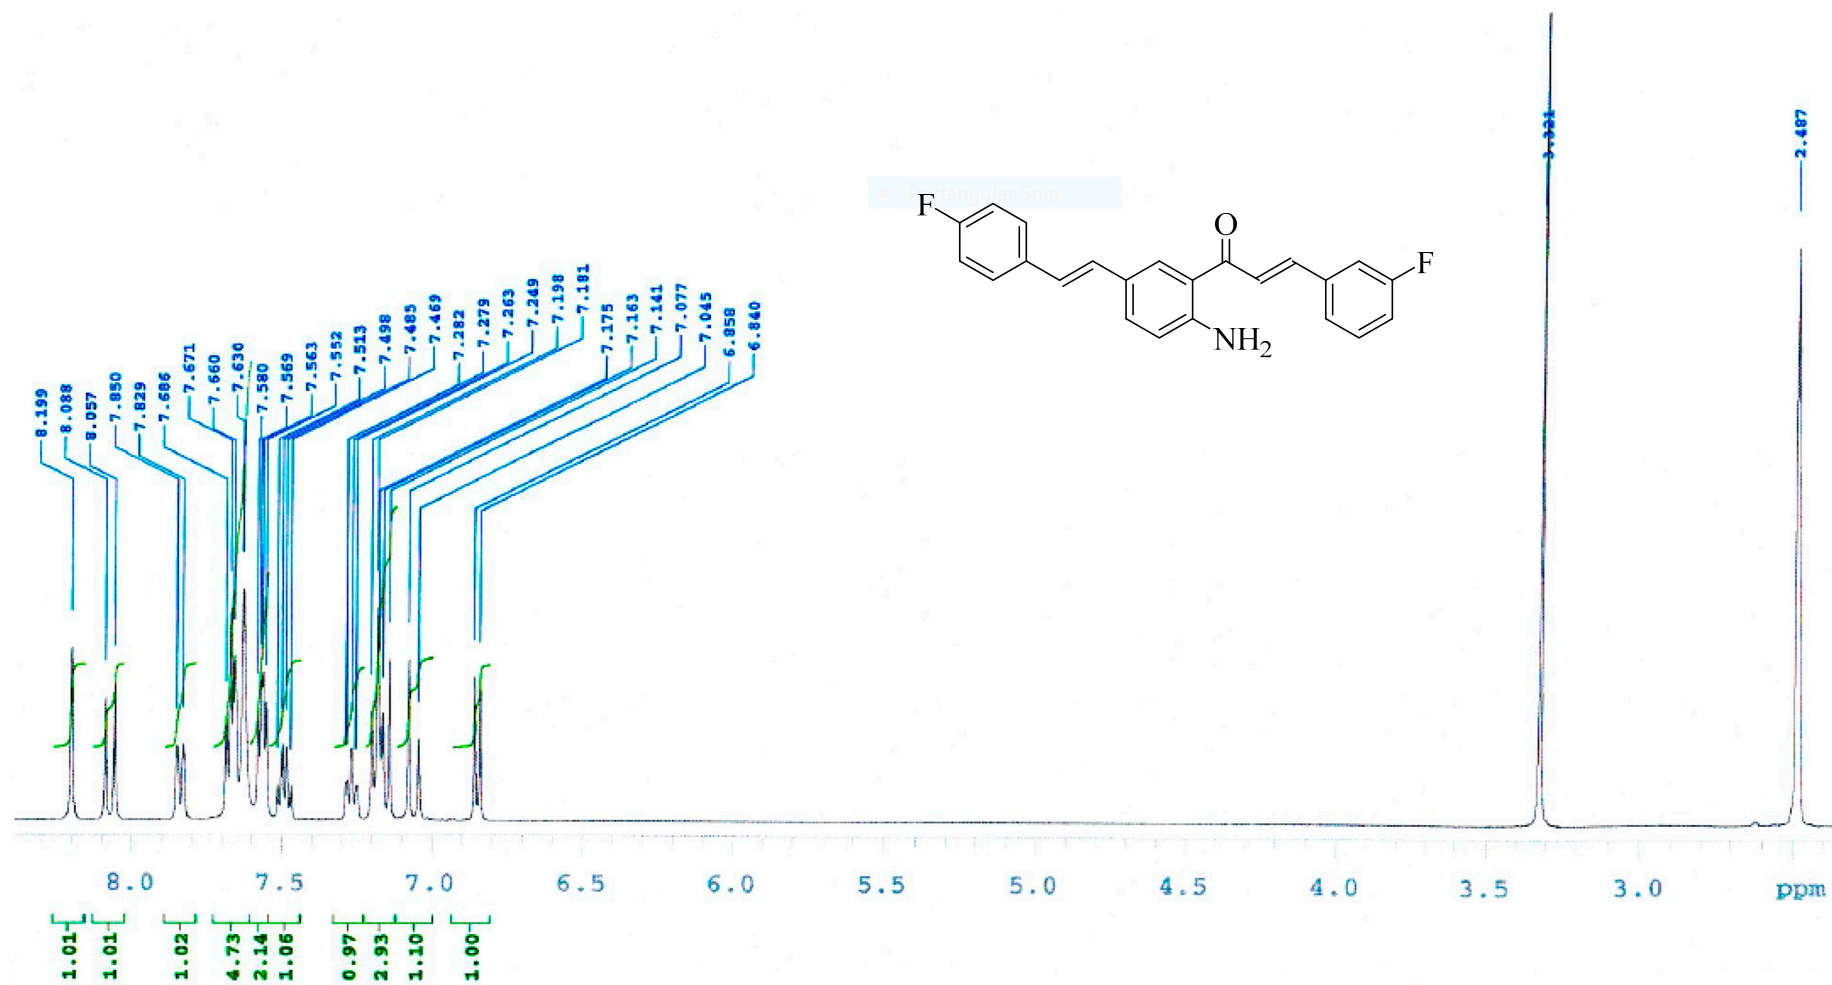

(a)



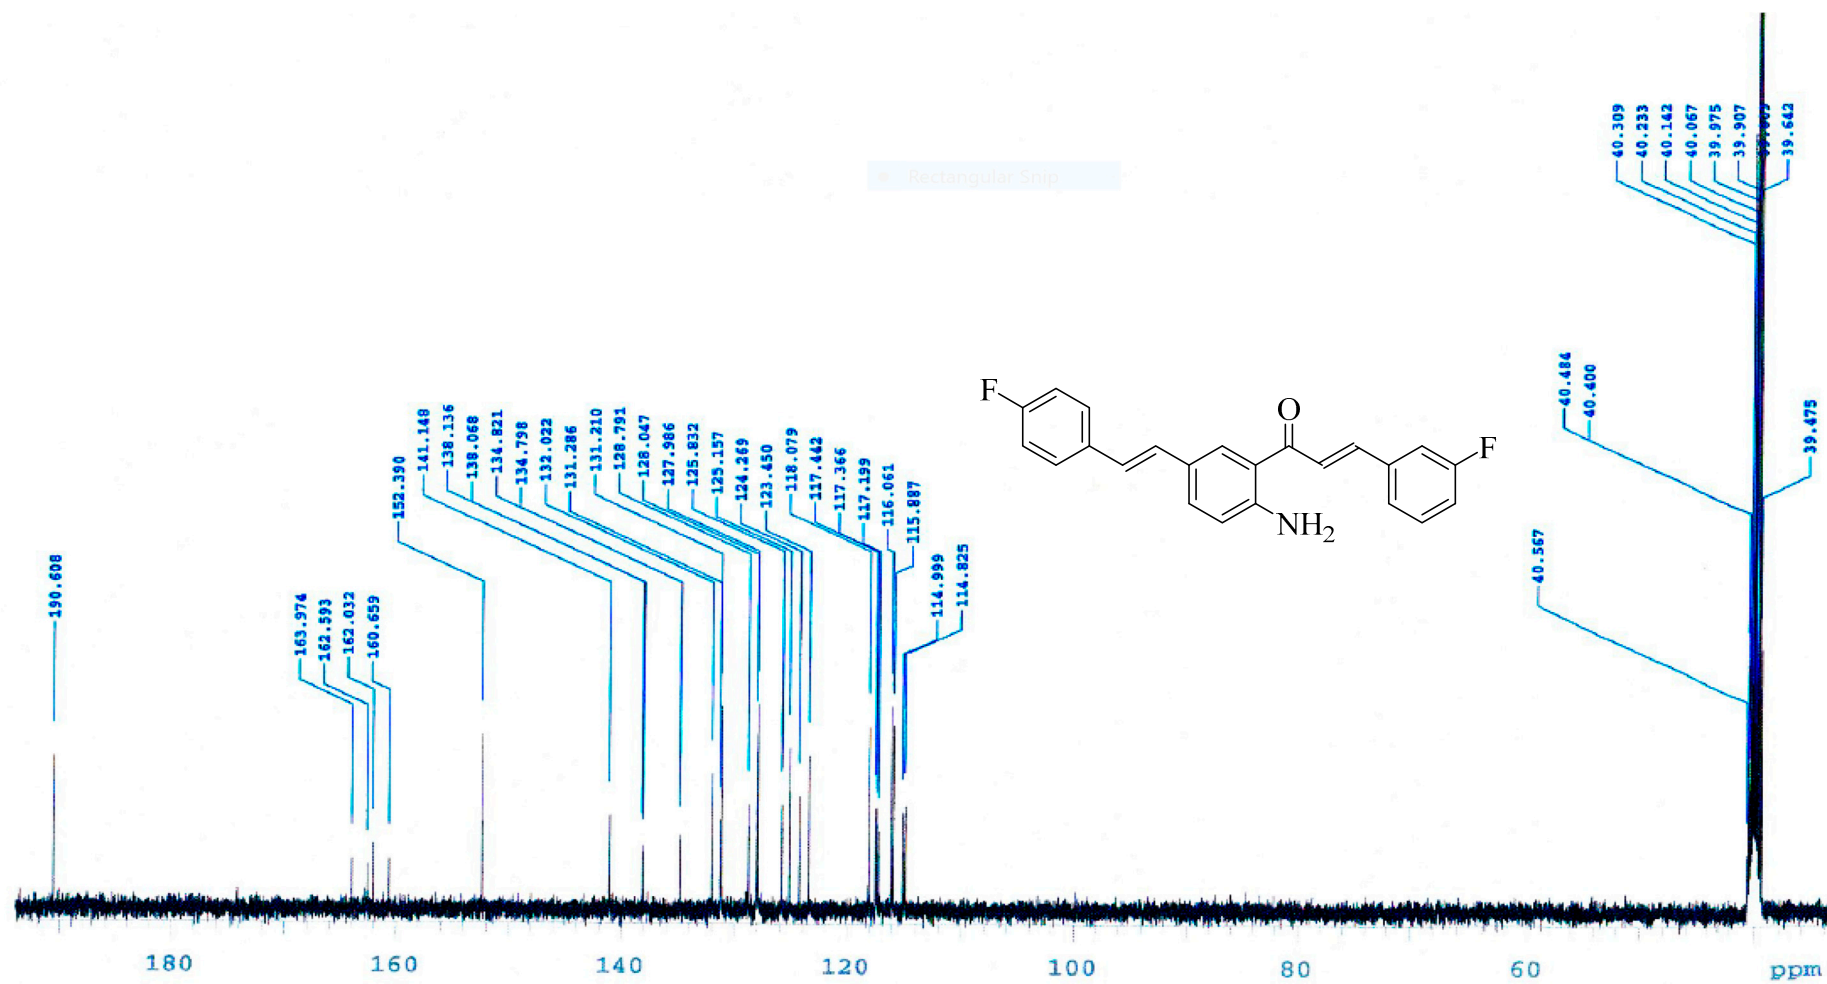

(b)

Figure S1.6: <sup>1</sup>H- and <sup>13</sup>C-NMR spectra of **3b** in DMSO-*d*<sub>6</sub> at 500 MHz (a) and 125 MHz (b), respectively.

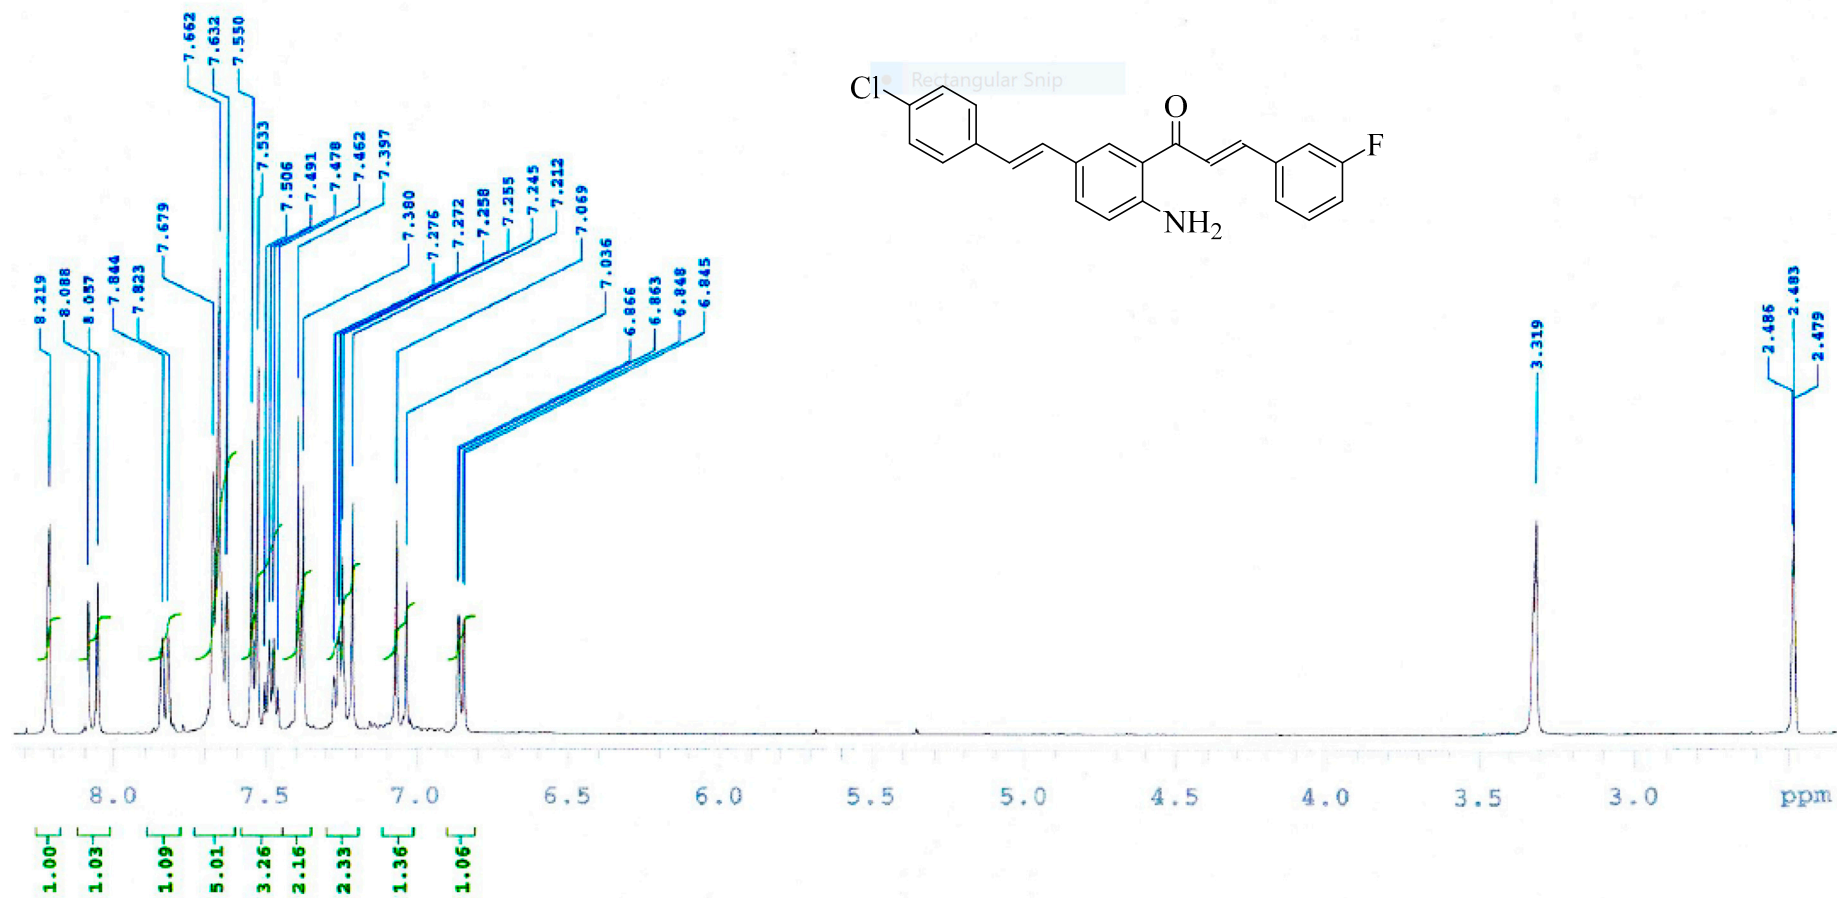

(a)

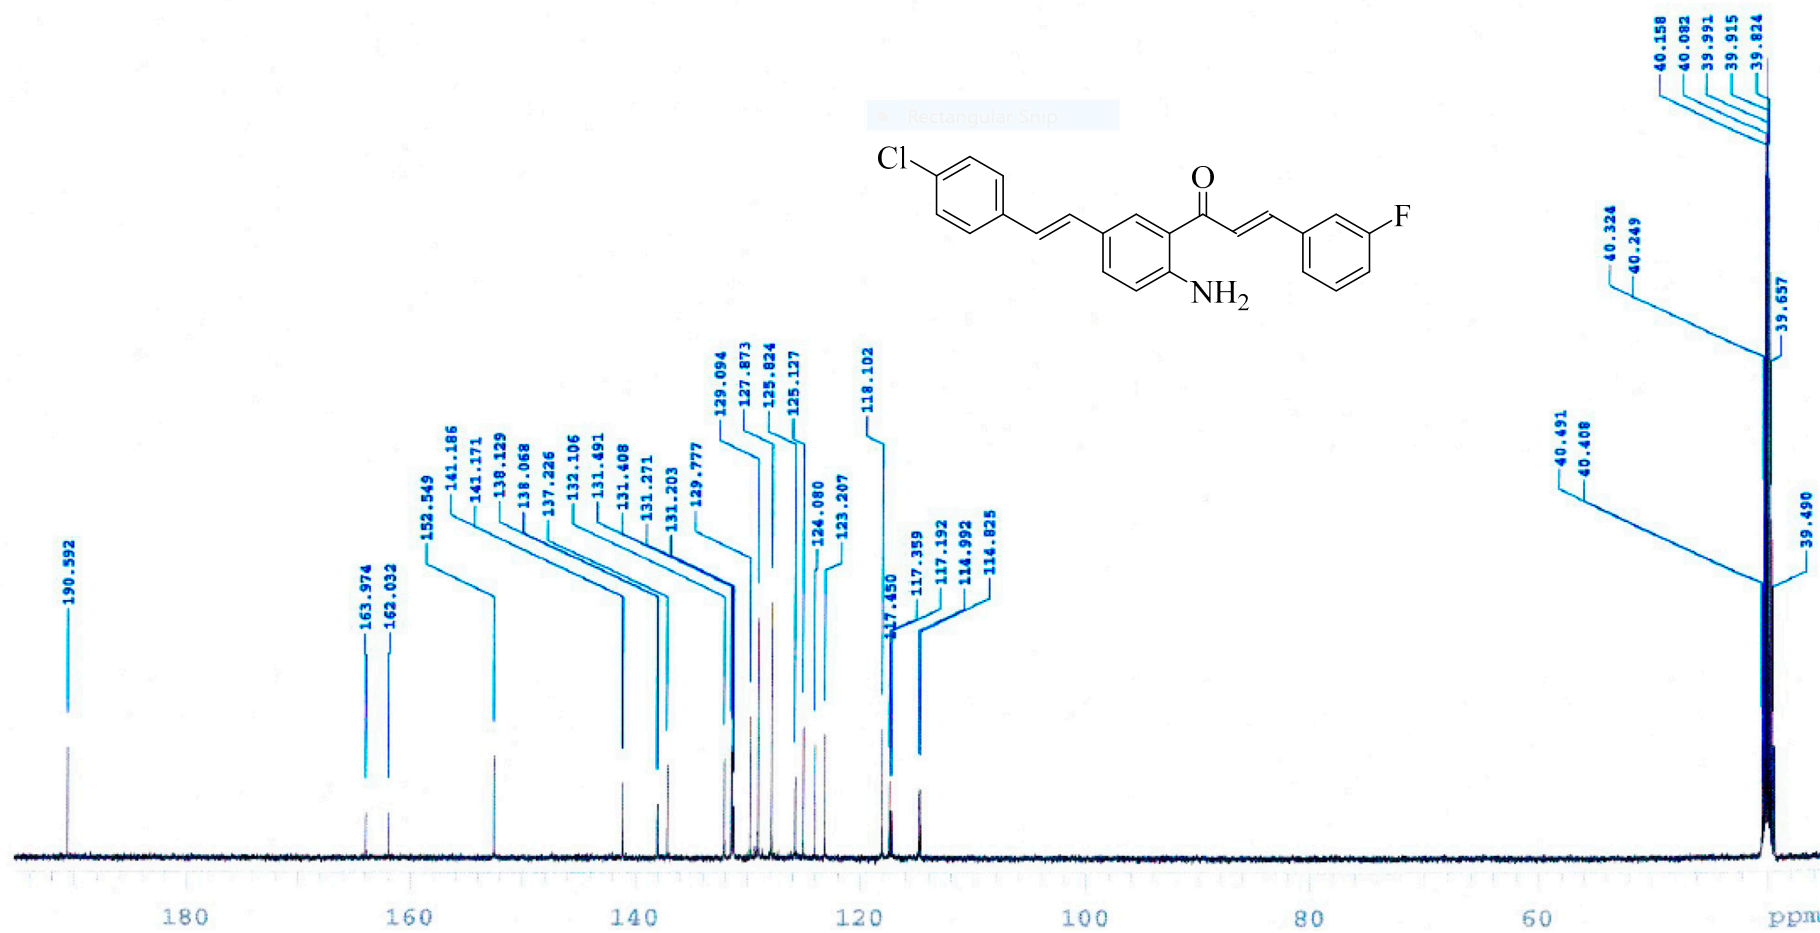

(b)

Figure S1.7: <sup>1</sup>H- and <sup>13</sup>C-NMR spectra of 3c in DMSO-*d*<sub>6</sub> at 500 MHz (a) and 125 MHz (b), respectively.

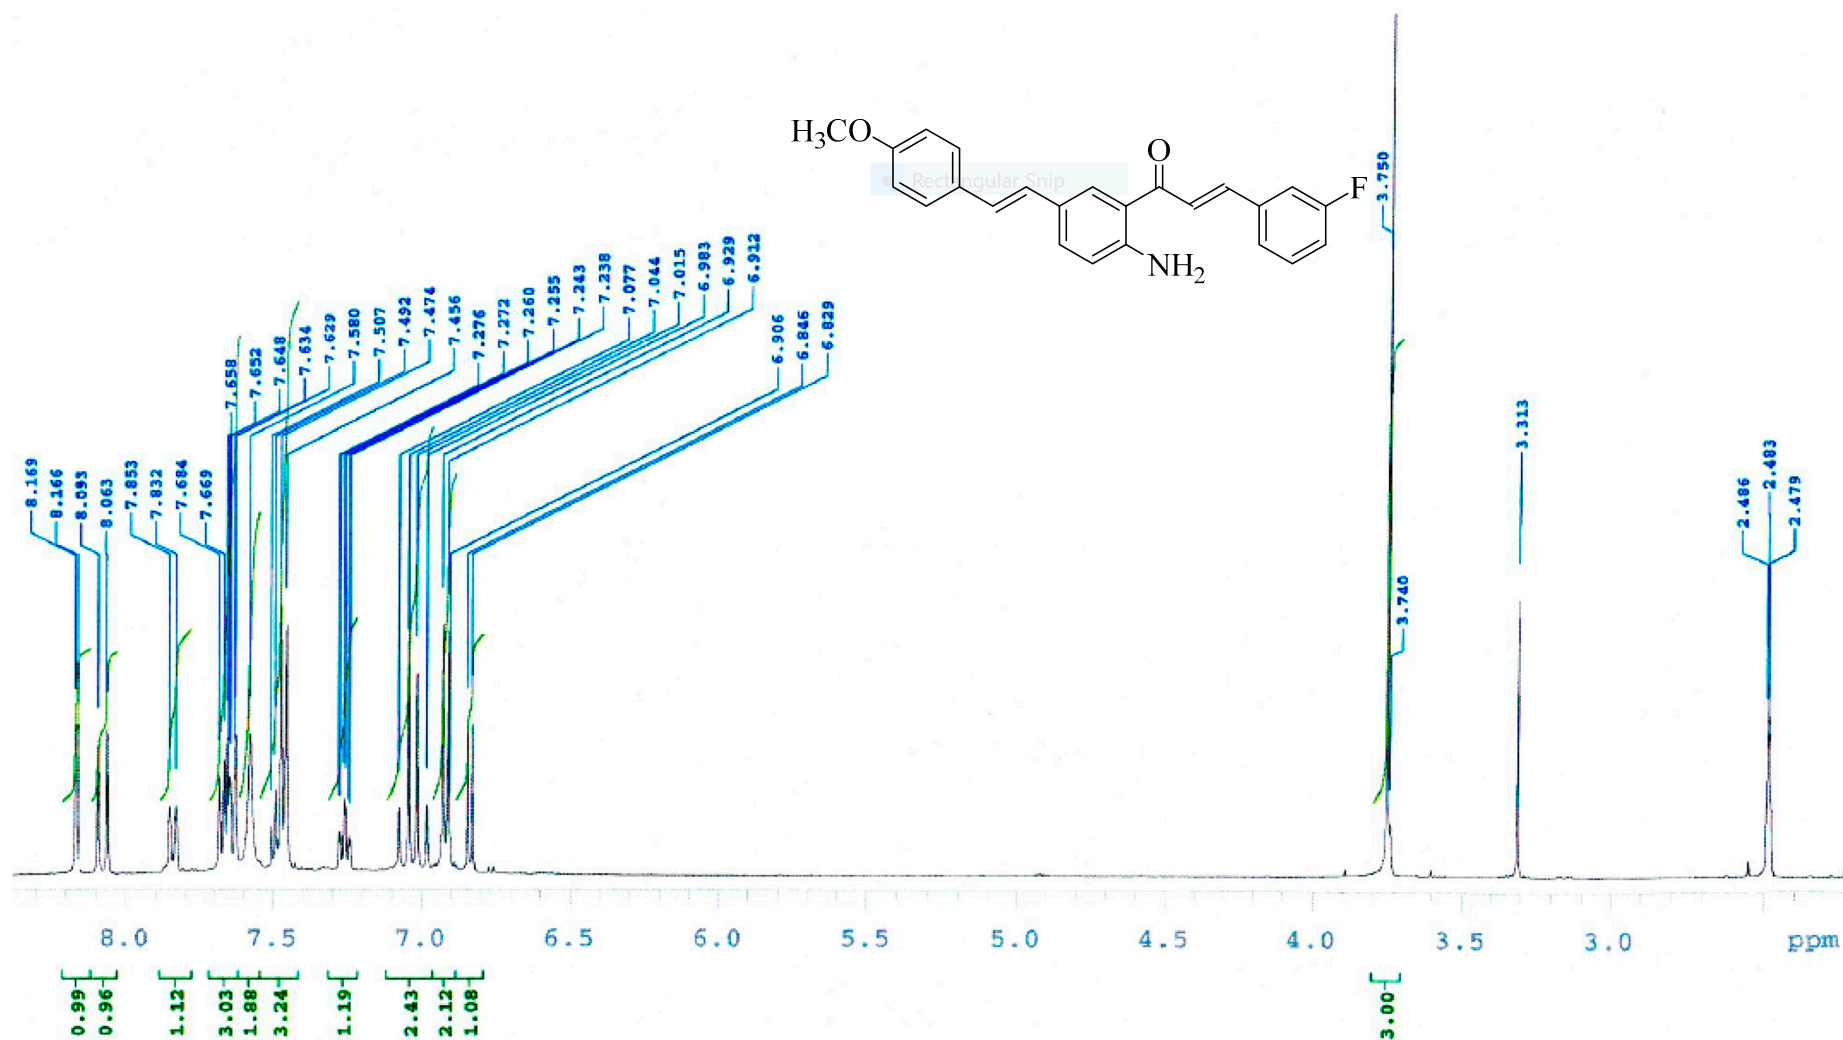

(a)

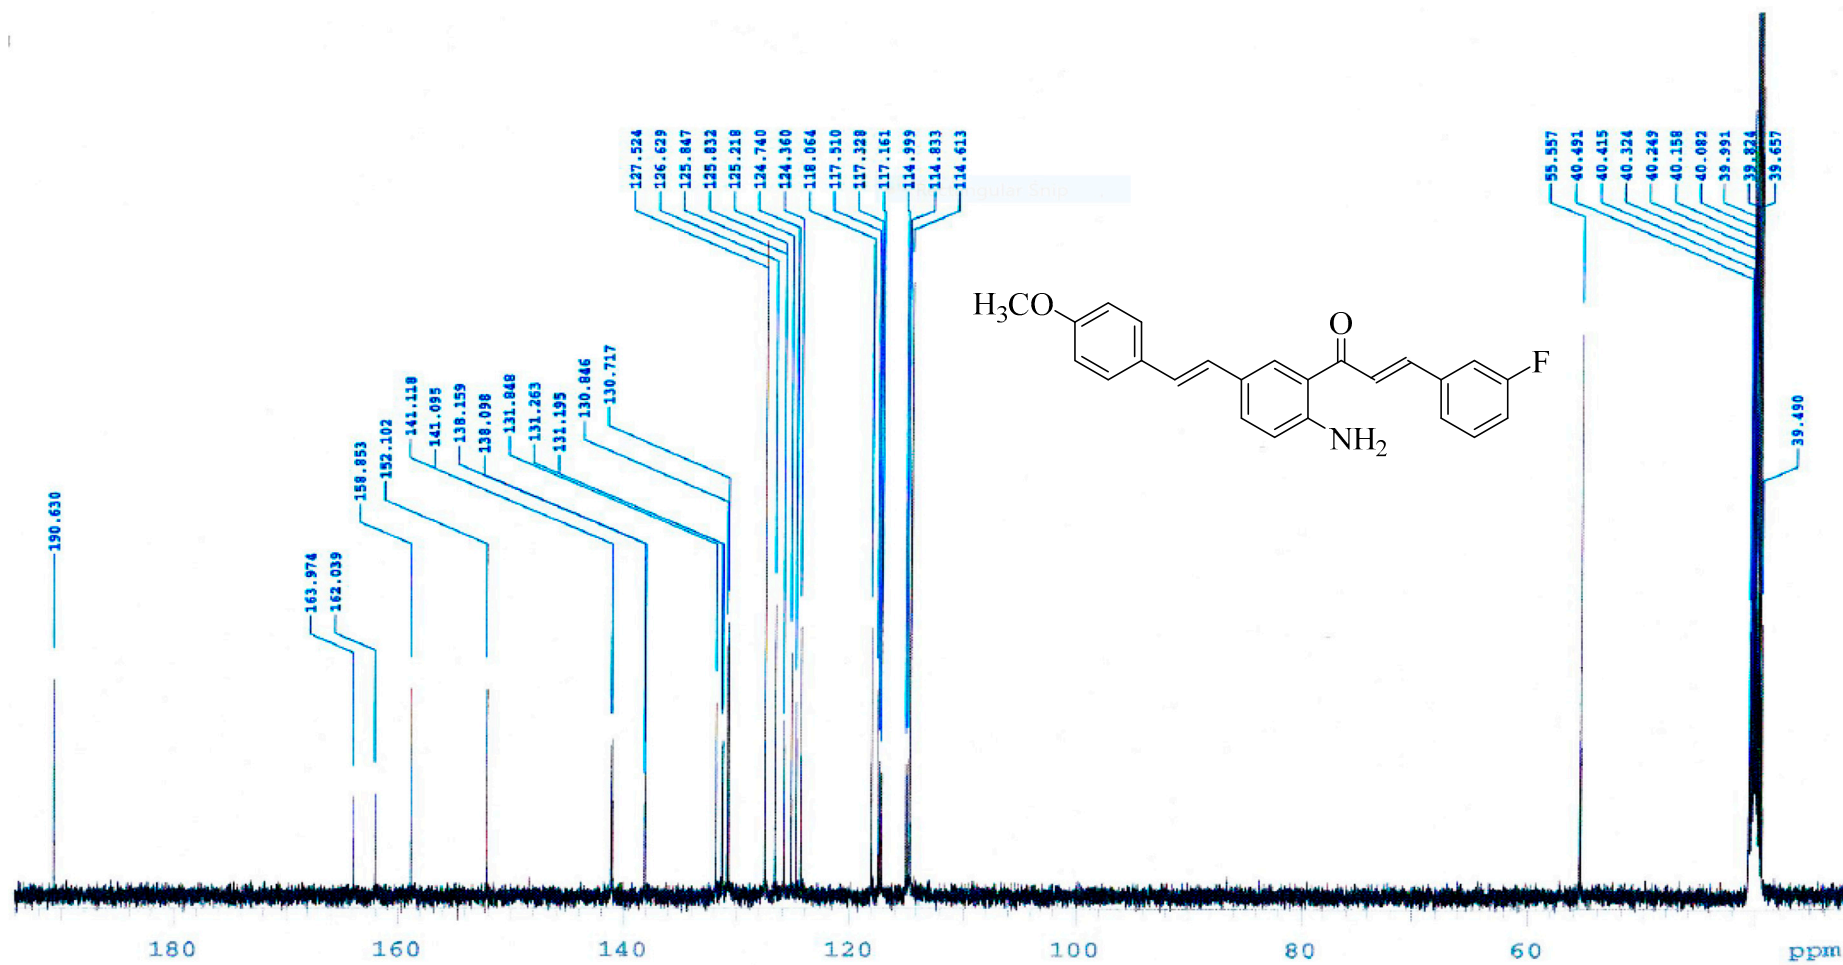

(b)

Figure S1.8: <sup>1</sup>H- and <sup>13</sup>C-NMR spectra of **3d** in DMSO-*d*<sub>6</sub> at 500 MHz (a) and 125 MHz (b), respectively.

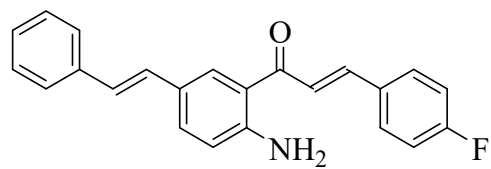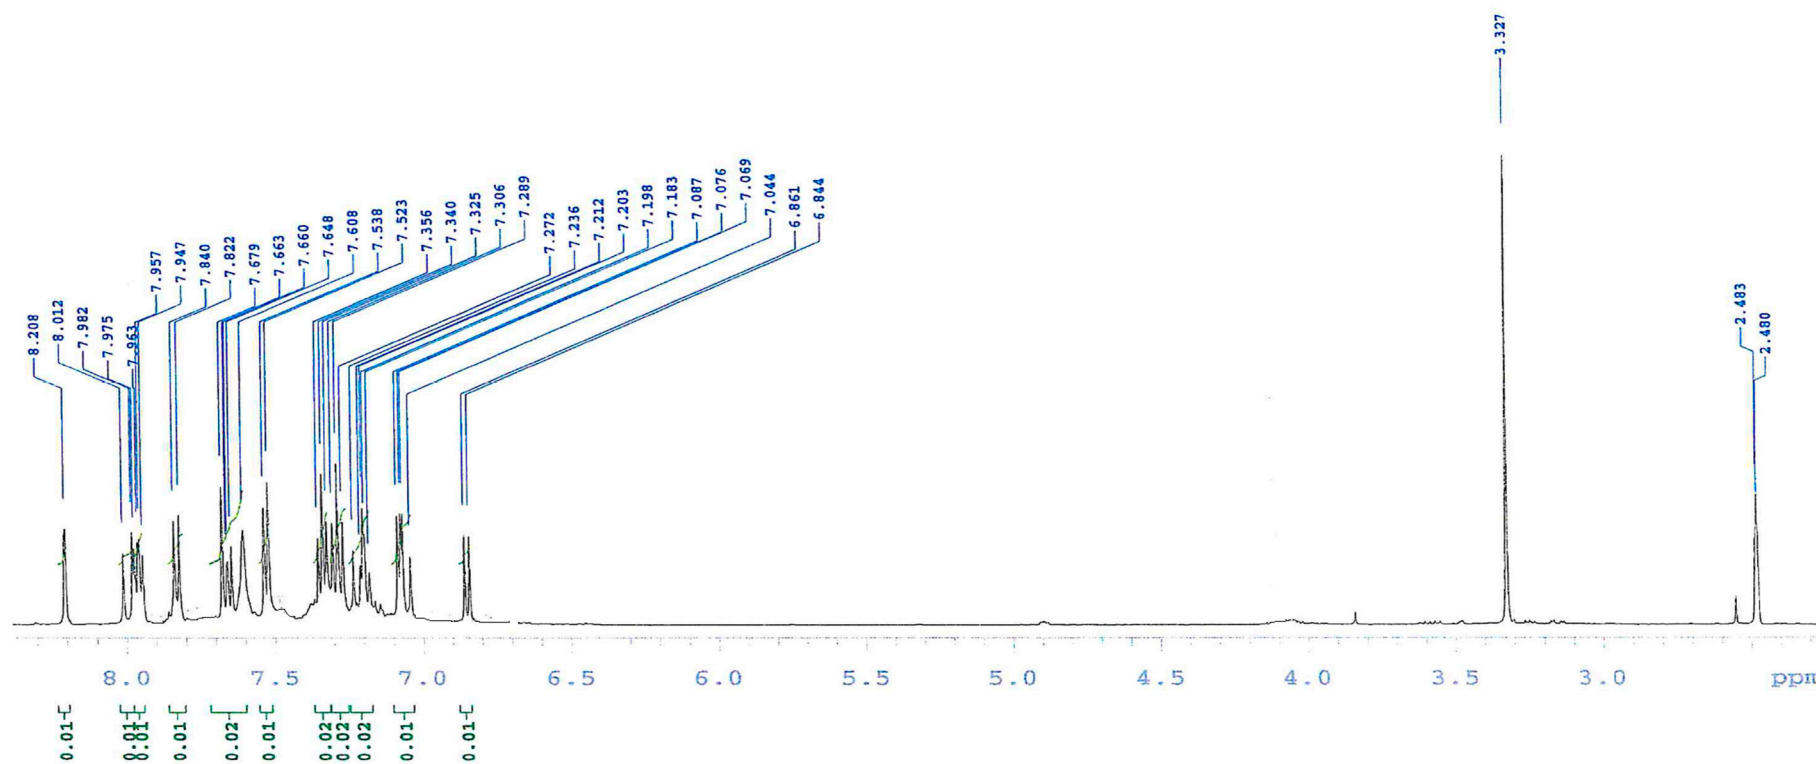

(a)



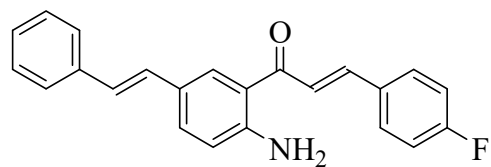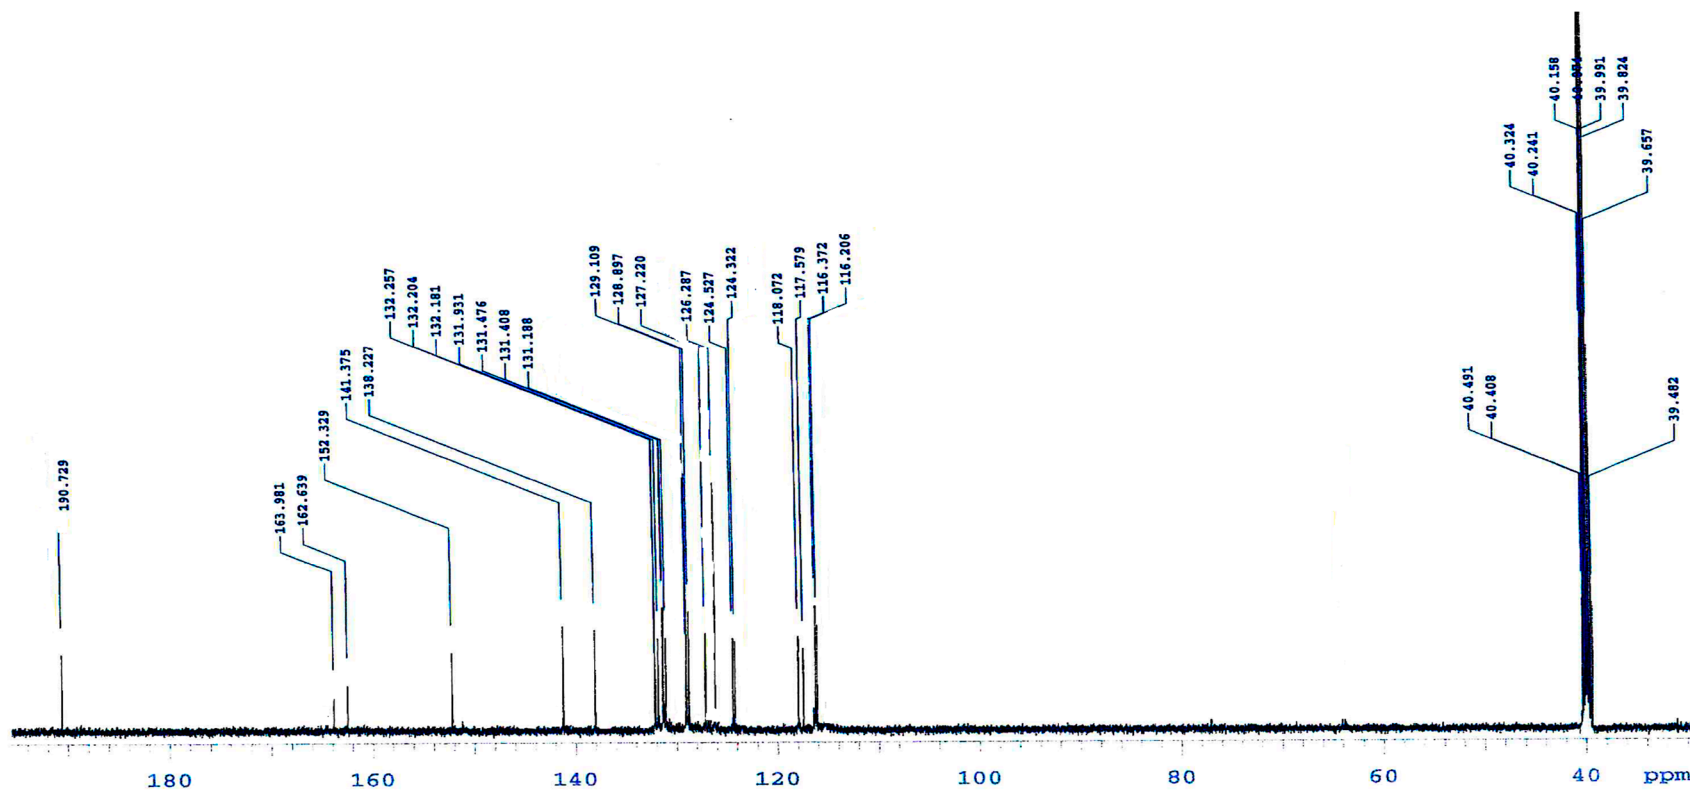

(b)

Figure S1.9:  $^1\text{H}$ - and  $^{13}\text{C}$ -NMR spectra of **3e** in  $\text{DMSO}-d_6$  at 500 MHz (a) and 125 MHz (b), respectively.

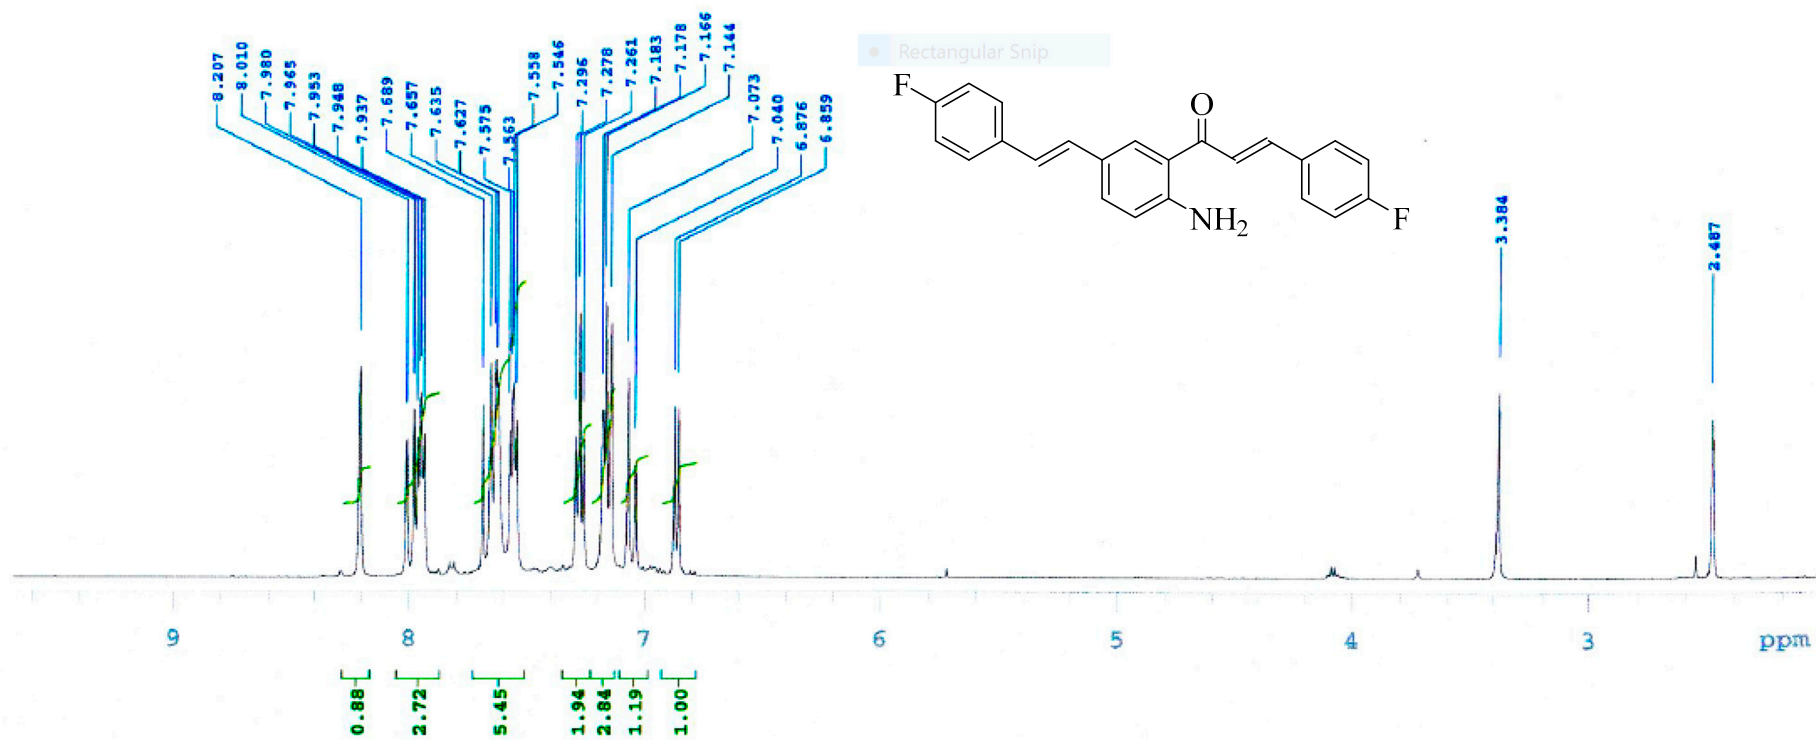

(a)



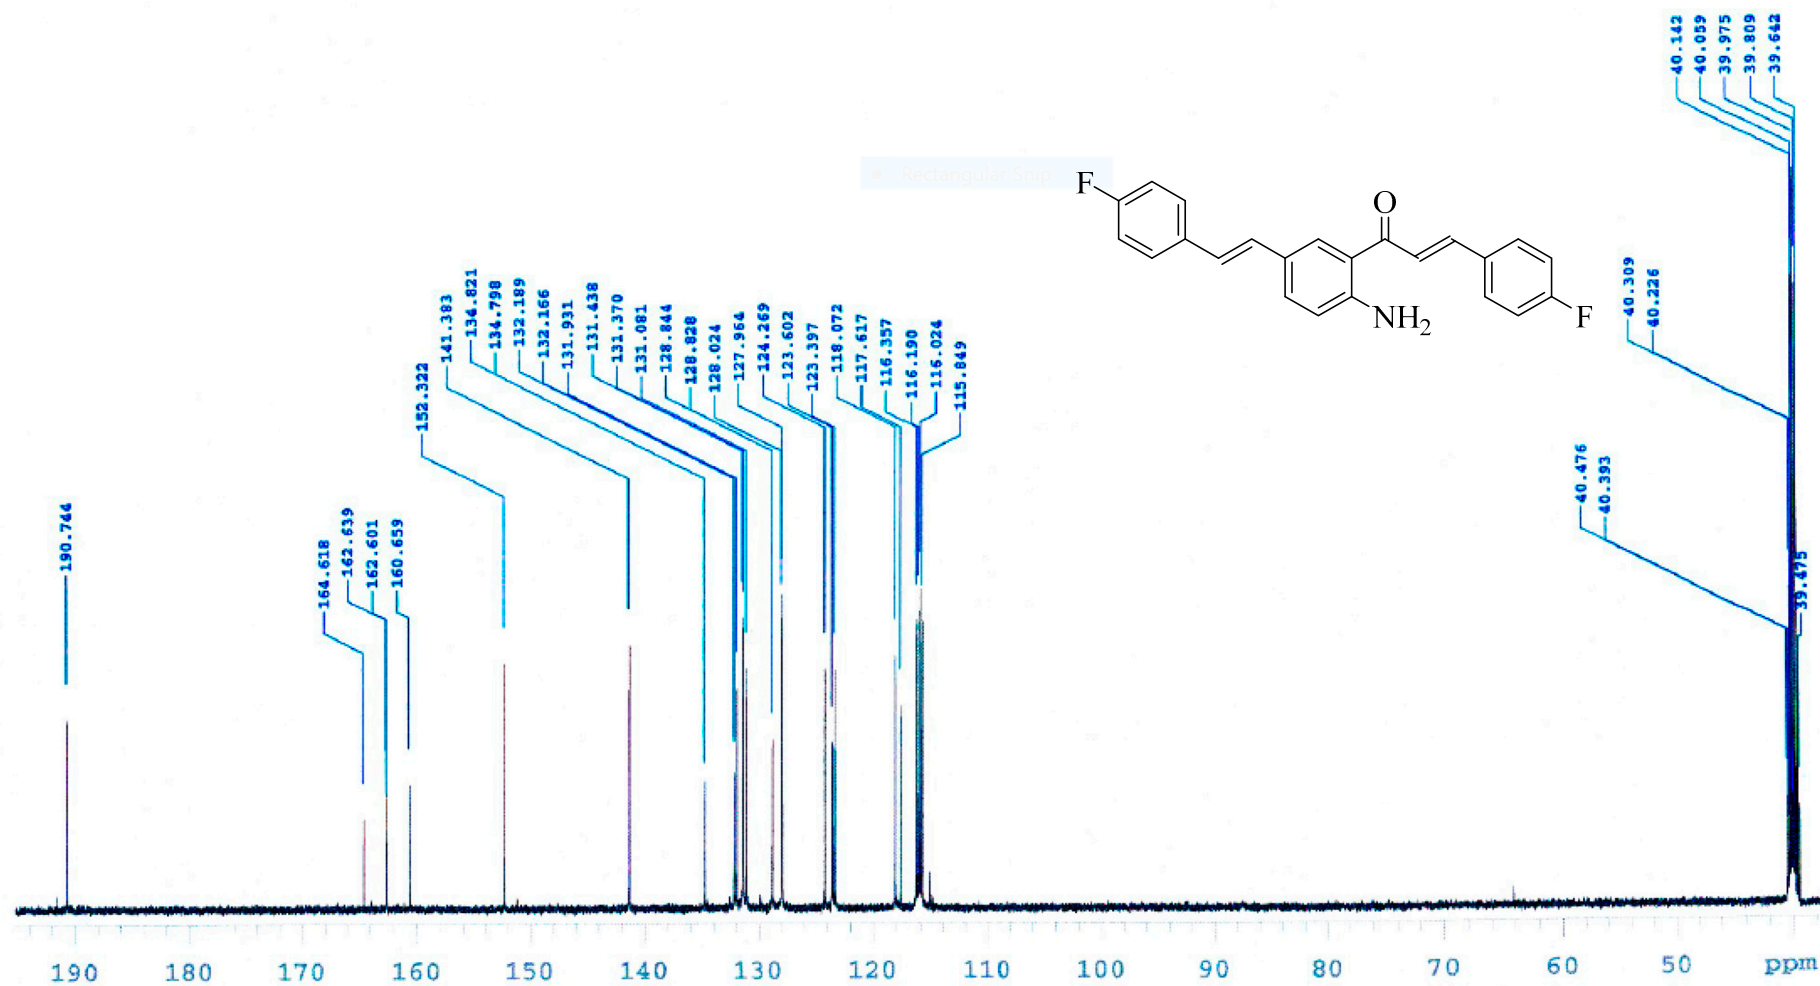

(b)

Figure S1.10: <sup>1</sup>H- and <sup>13</sup>C-NMR spectra of 3f in DMSO-*d*<sub>6</sub> at 500 MHz (a) and 125 MHz (b), respectively.

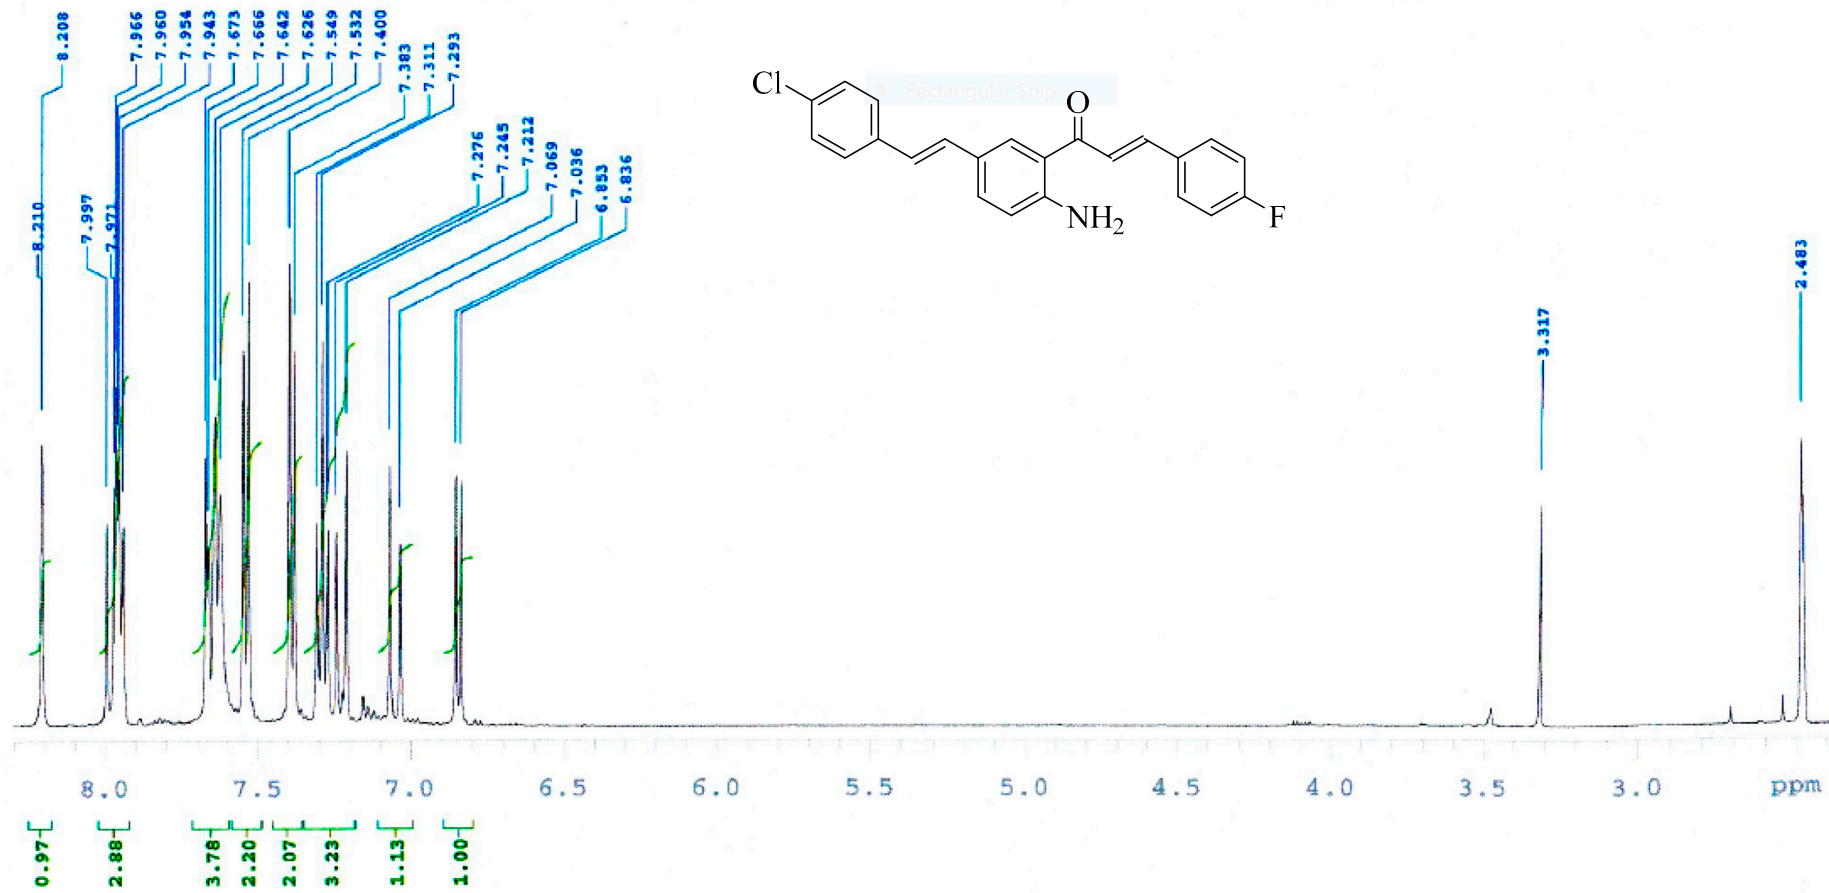

(a)

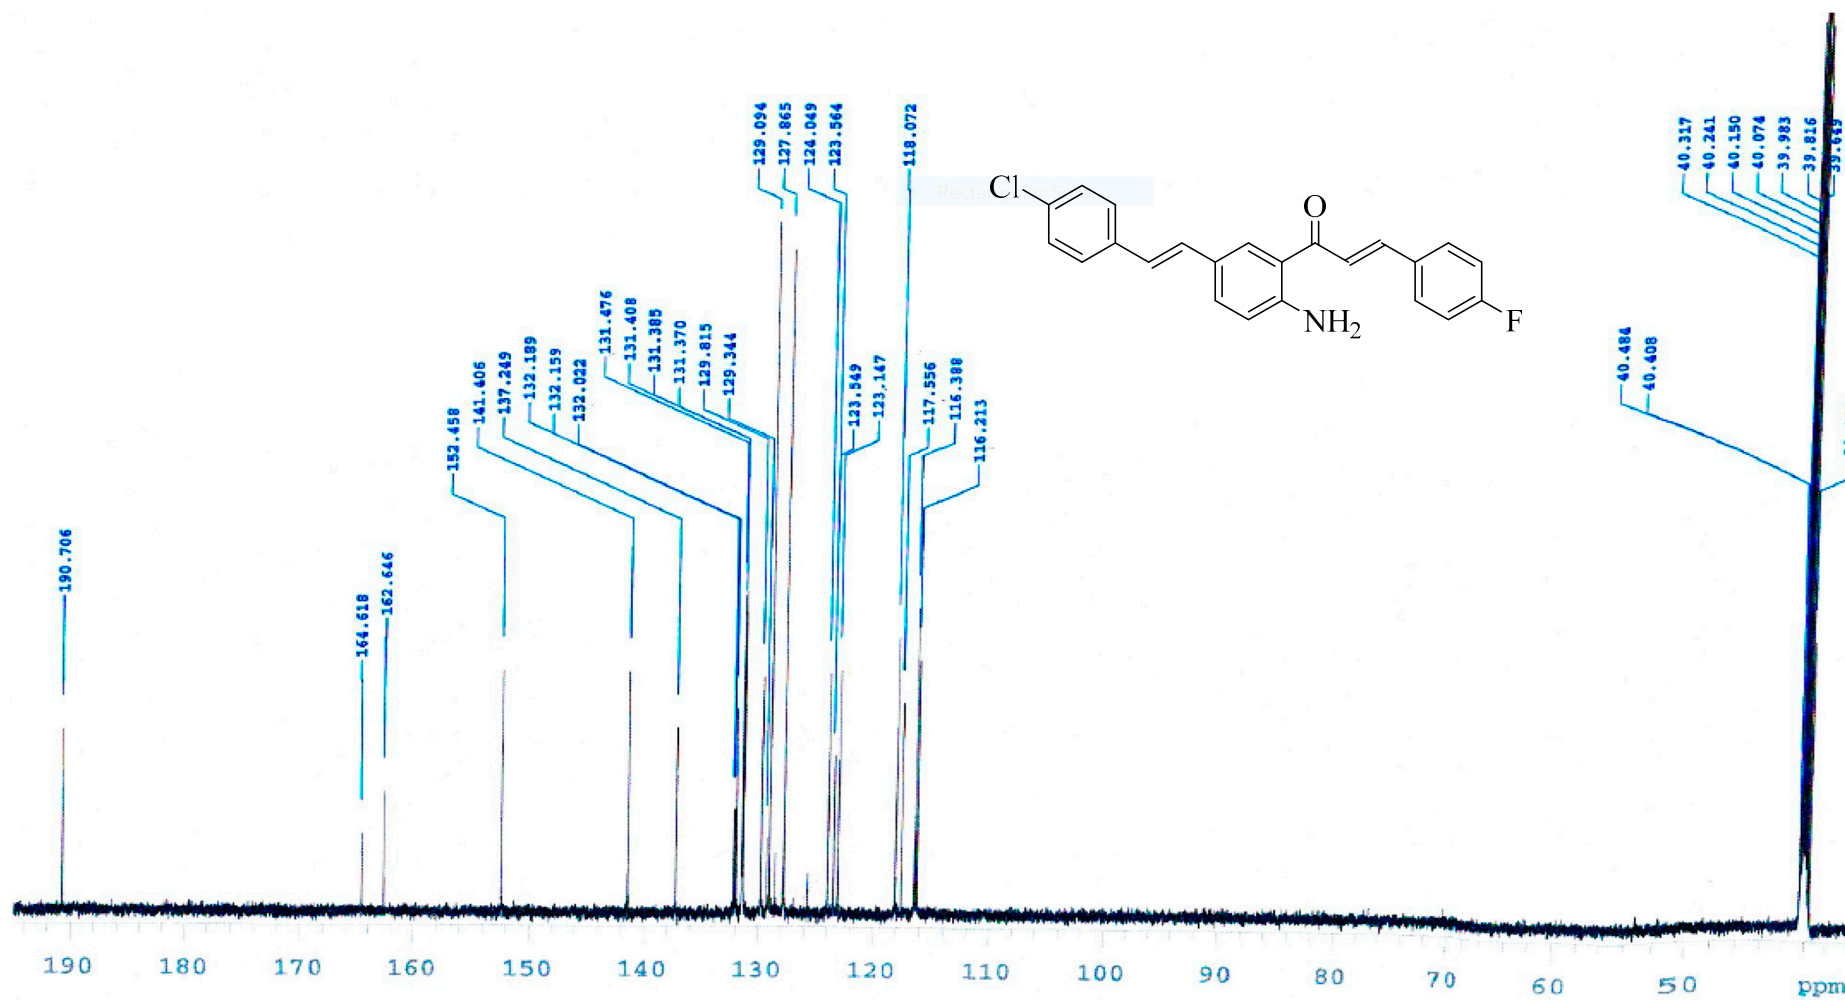

(b)

Figure S1.11: <sup>1</sup>H- and <sup>13</sup>C-NMR spectra of 3g in DMSO-*d*<sub>6</sub> at 500 MHz (a) and 125 MHz (b), respectively.

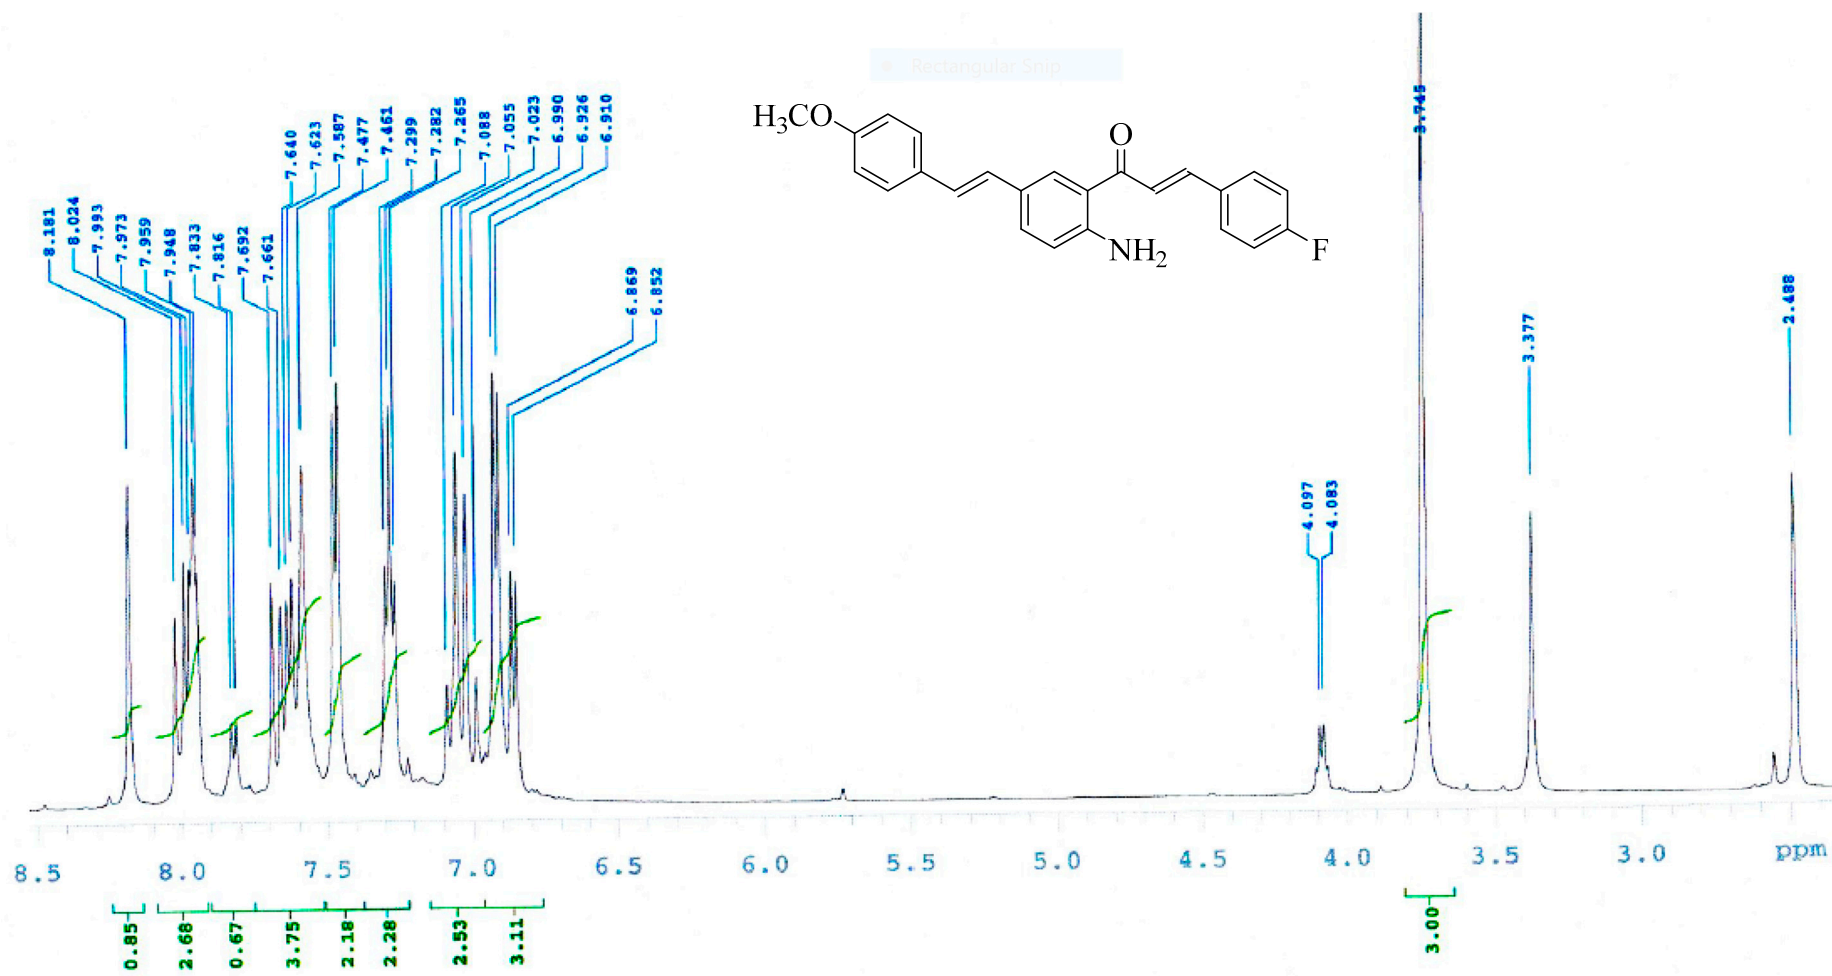

(a)

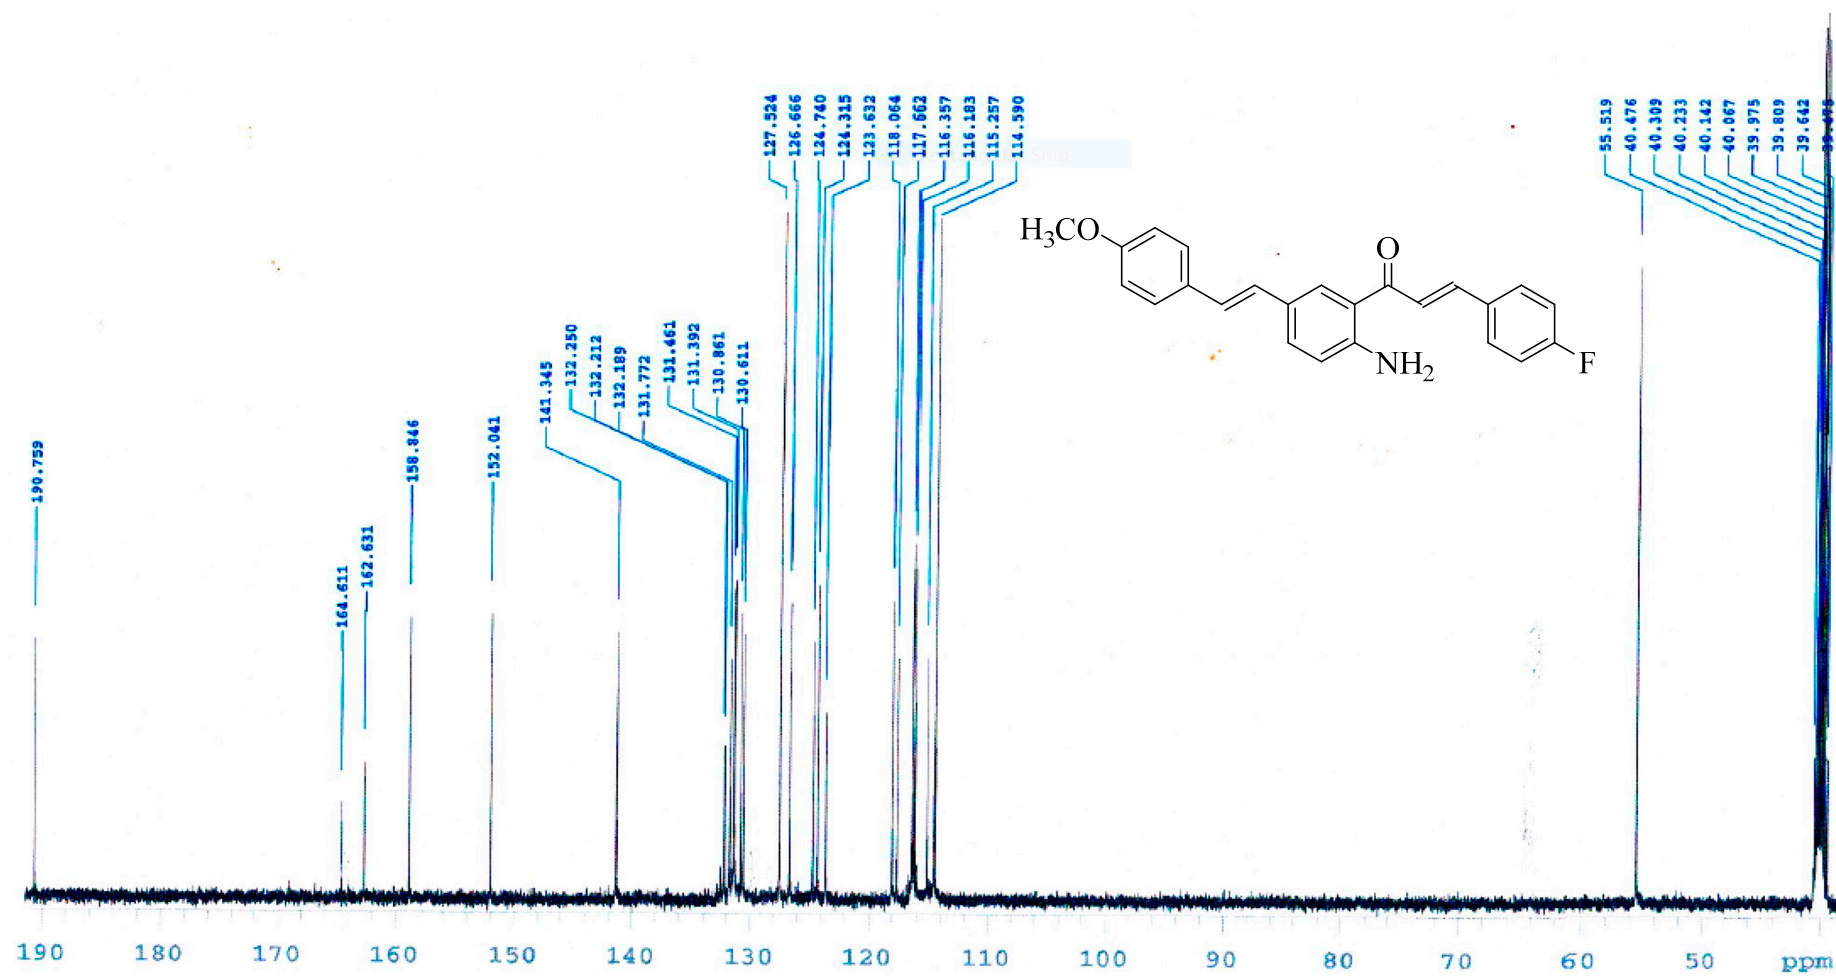

(b)

Figure S1.12: <sup>1</sup>H- and <sup>13</sup>C-NMR spectra of **3h** in DMSO-*d*<sub>6</sub> at 500 MHz (a) and 125 MHz (b), respectively.



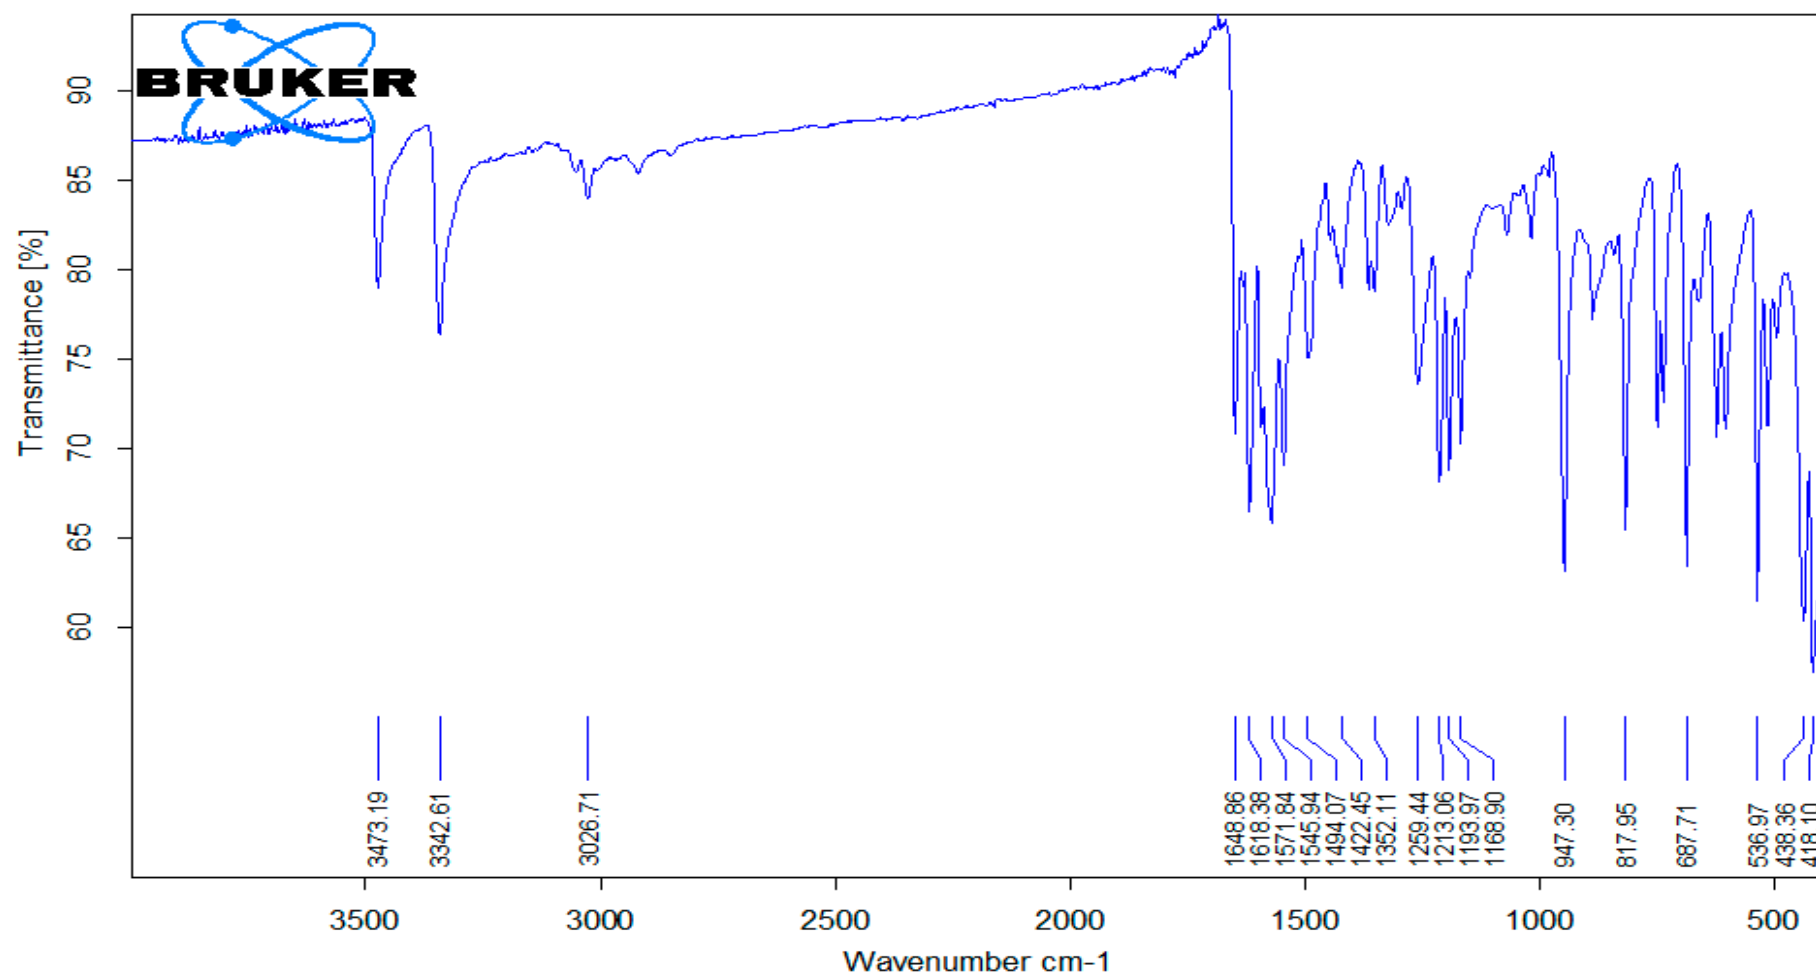

**Figure S2.1:** FT-IR spectrum of **2a**.

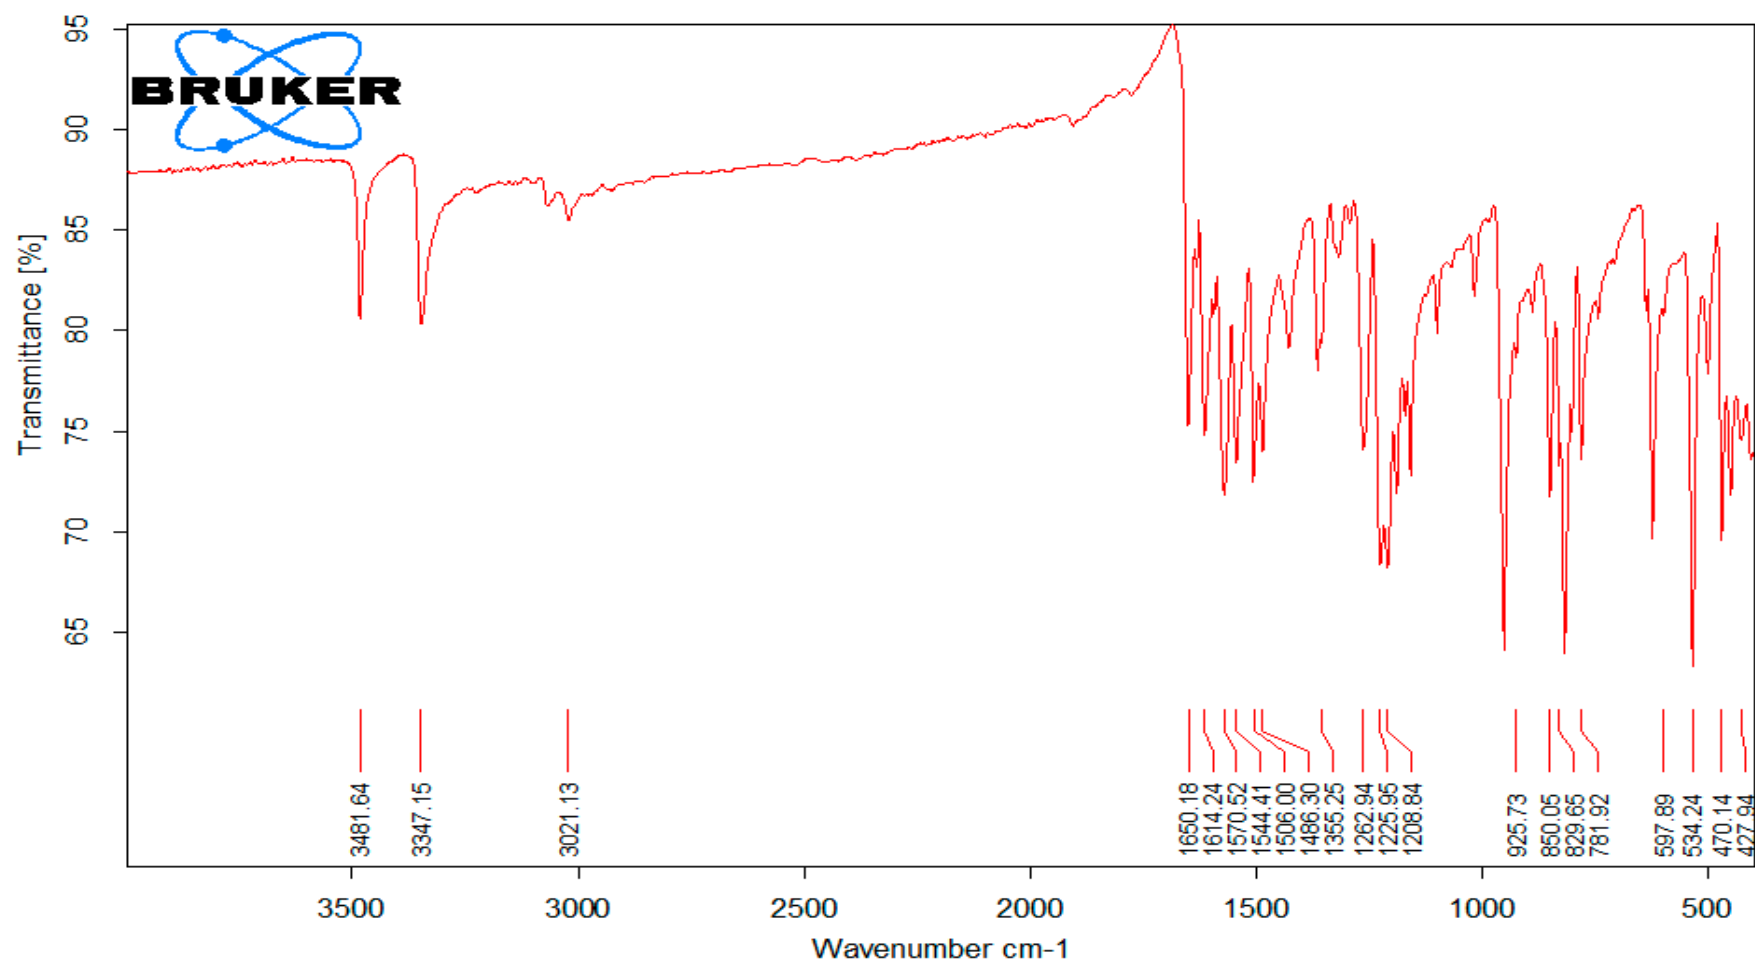

**Figure S2.2:** FT-IR spectrum of **2b**.



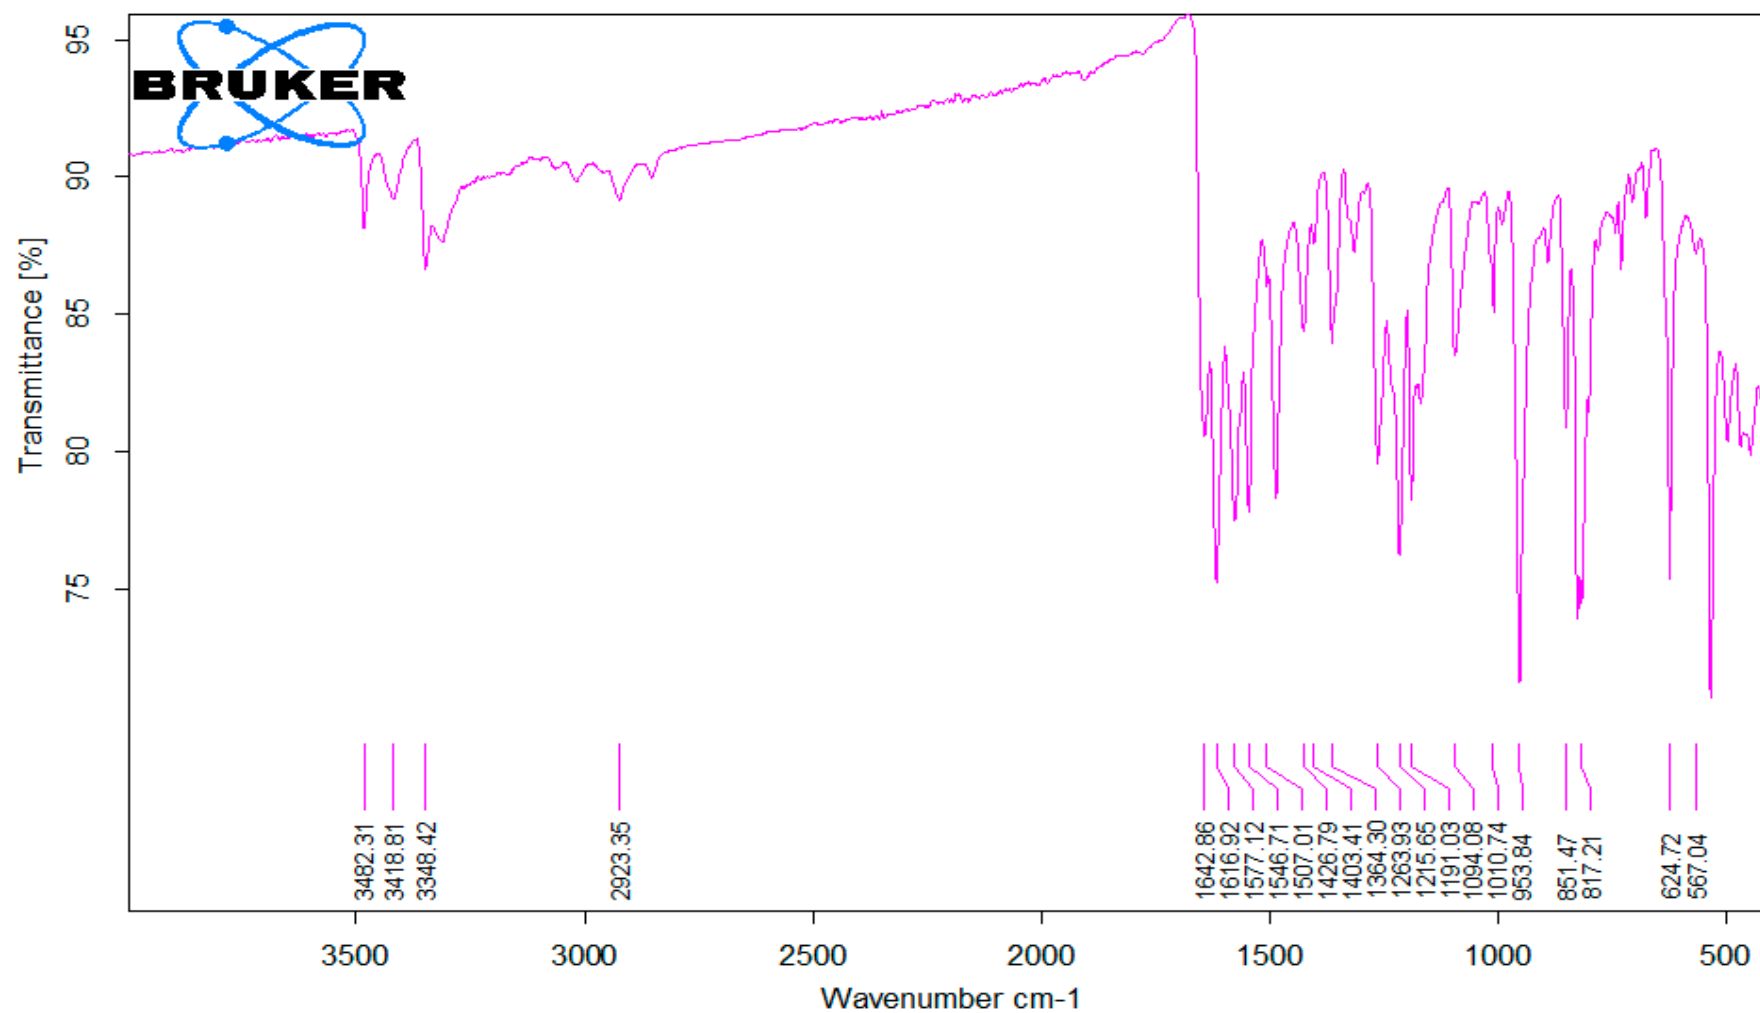

**Figure S2.3:** FT-IR spectrum of **2c**.

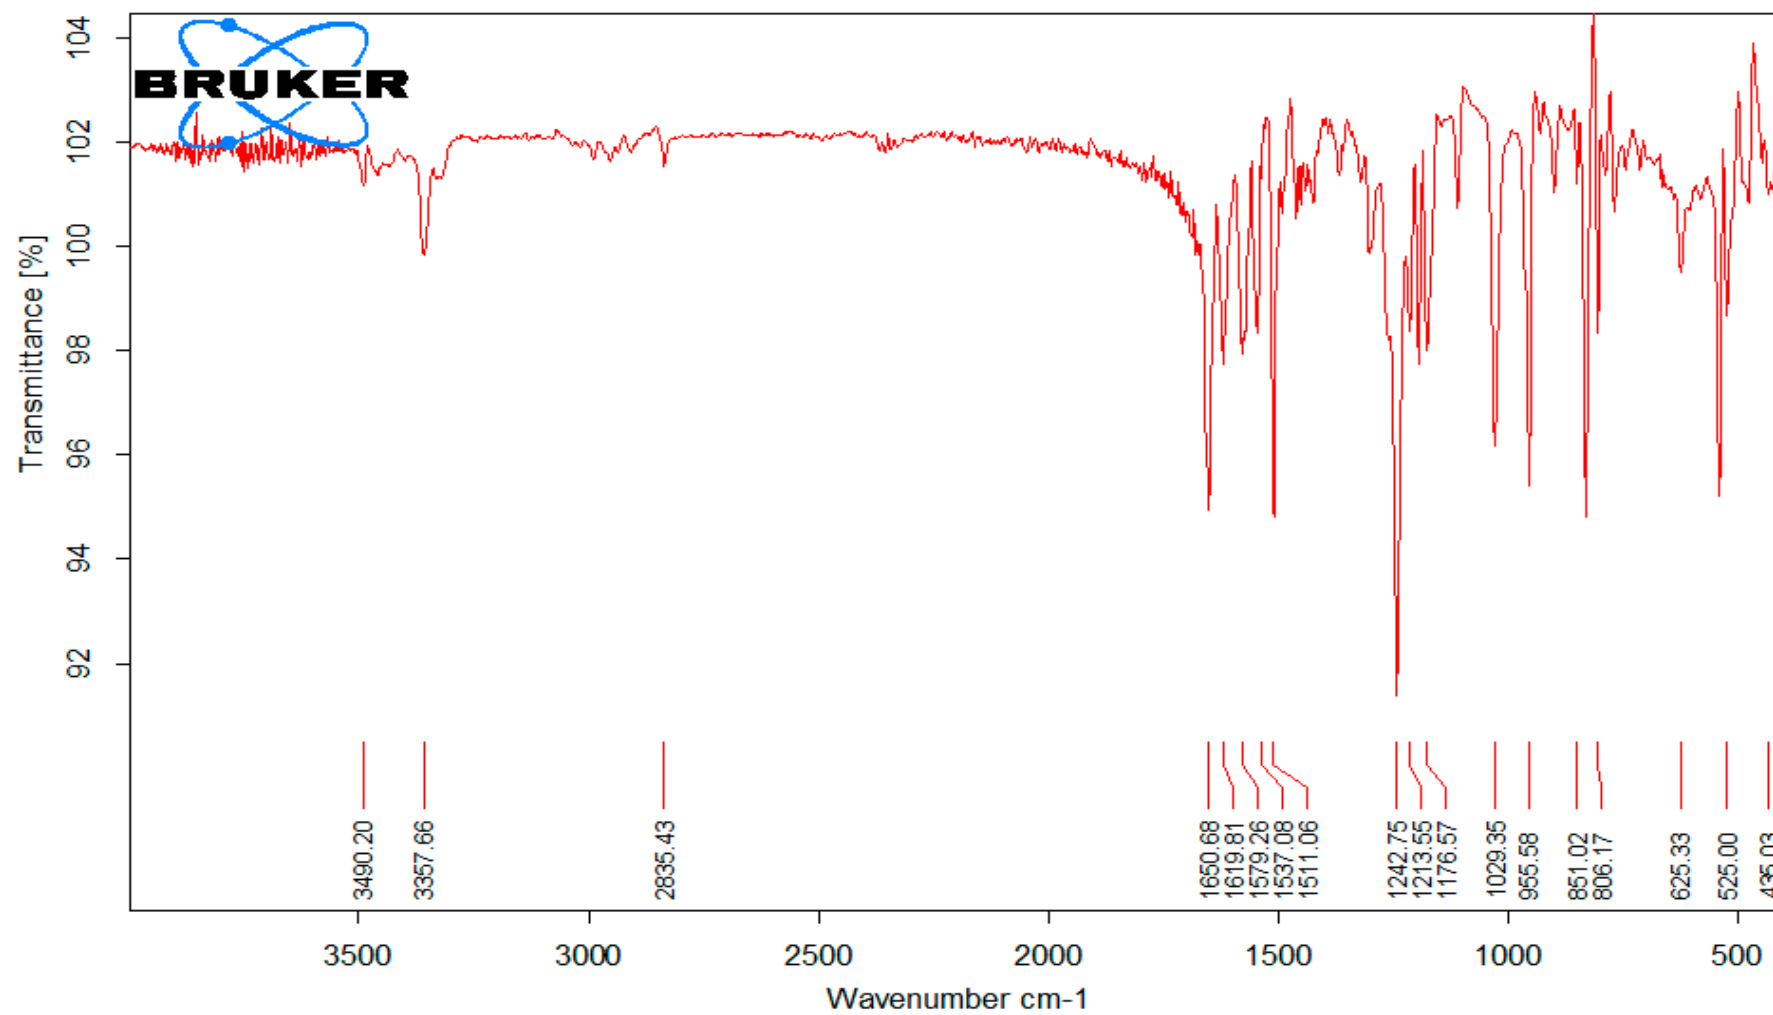

**Figure S2.4:** FT-IR spectrum of **2d**.

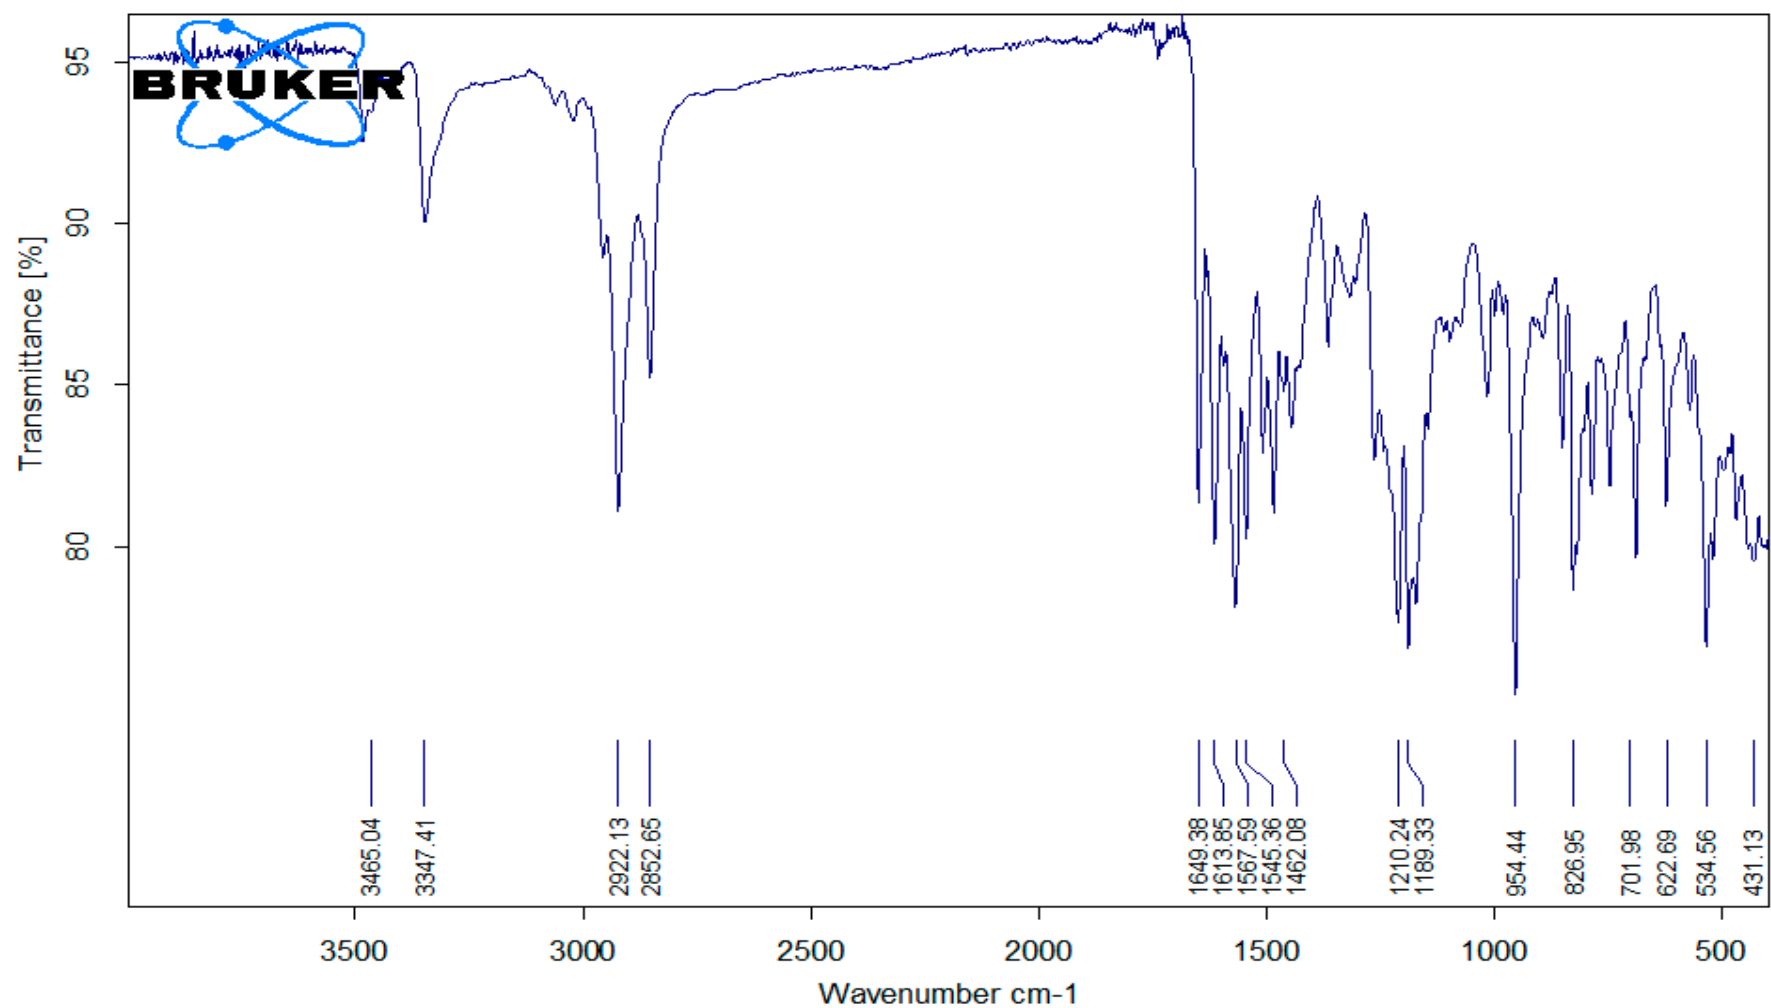

**Figure S2.5:** FT-IR spectrum of **3a**.

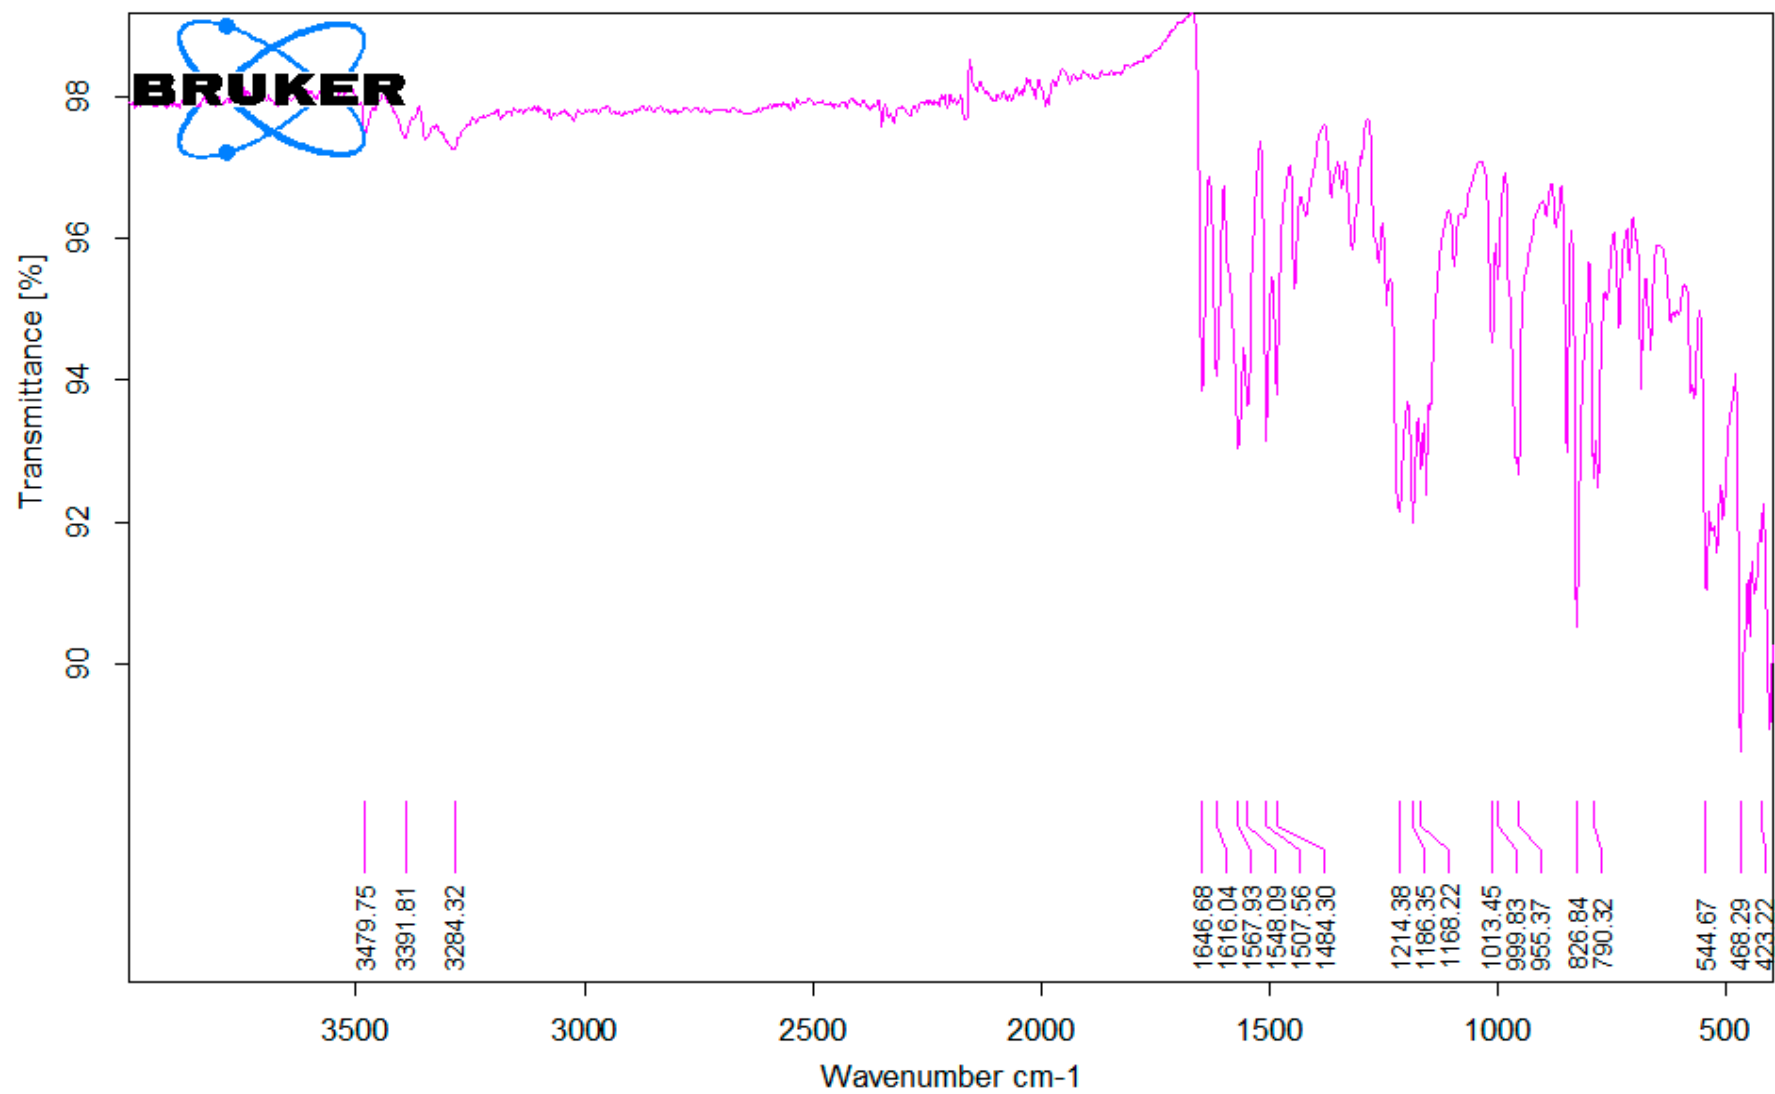

**Figure S2.6:** FT-IR spectrum of **3b**.

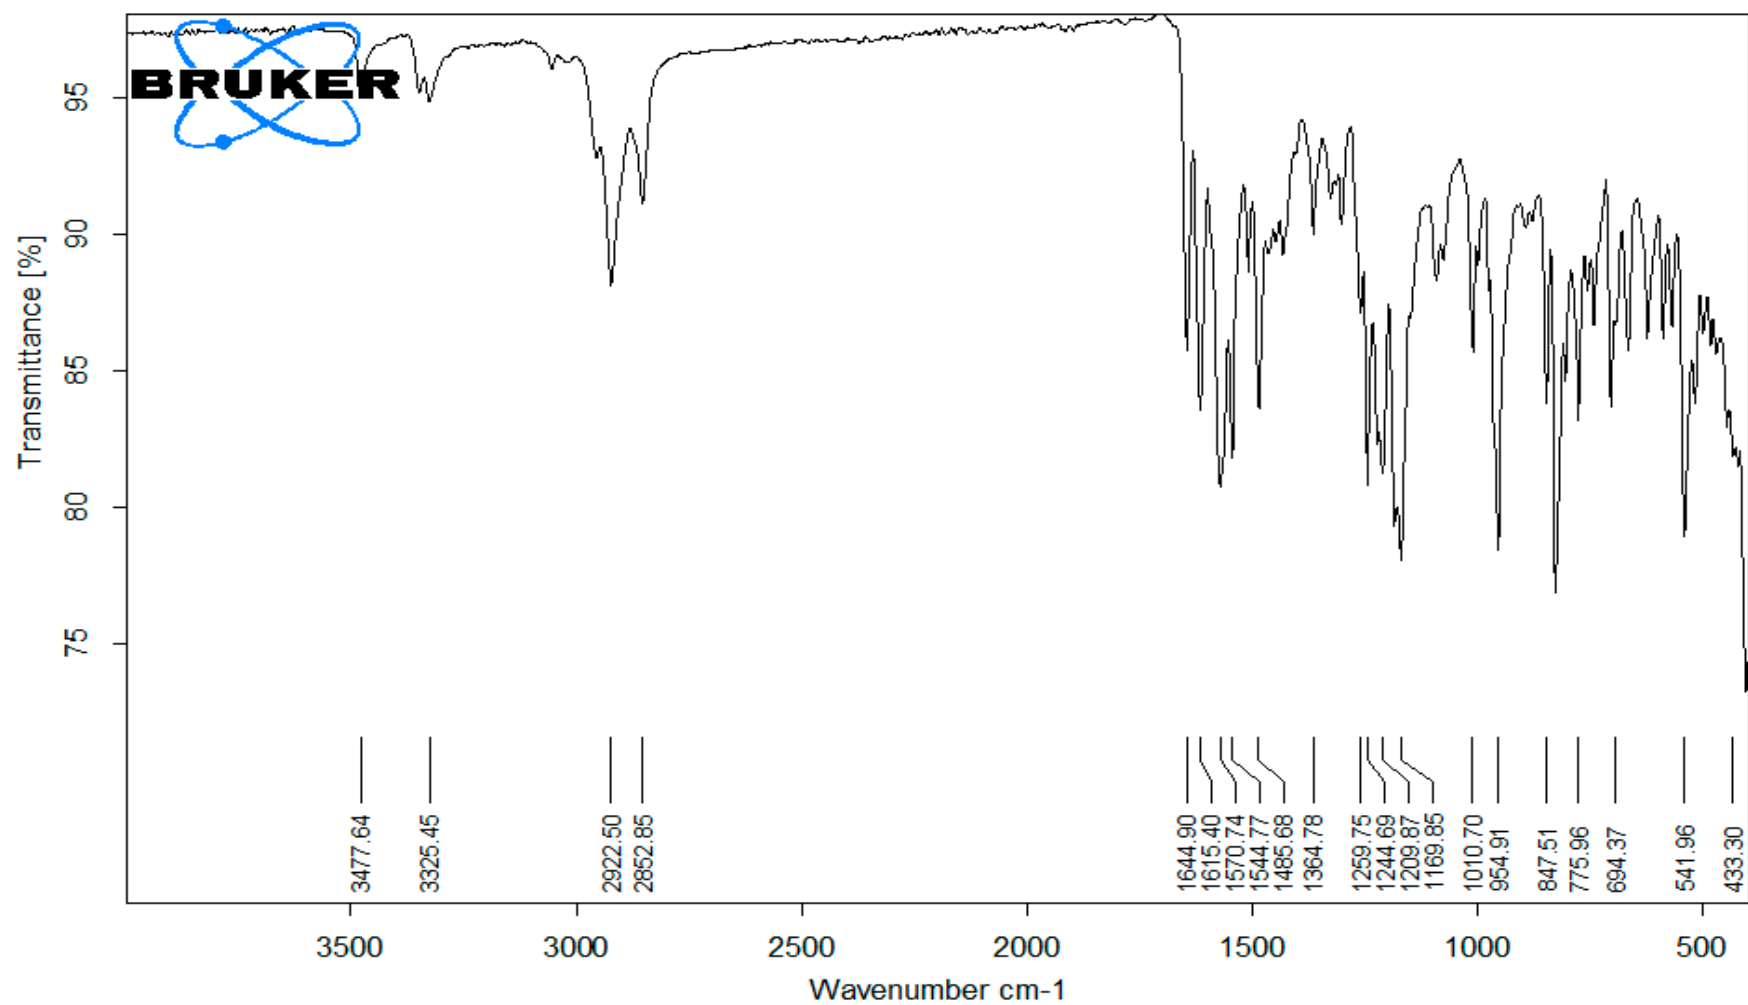

**Figure S2.7:** FT-IR spectrum of **3c**.

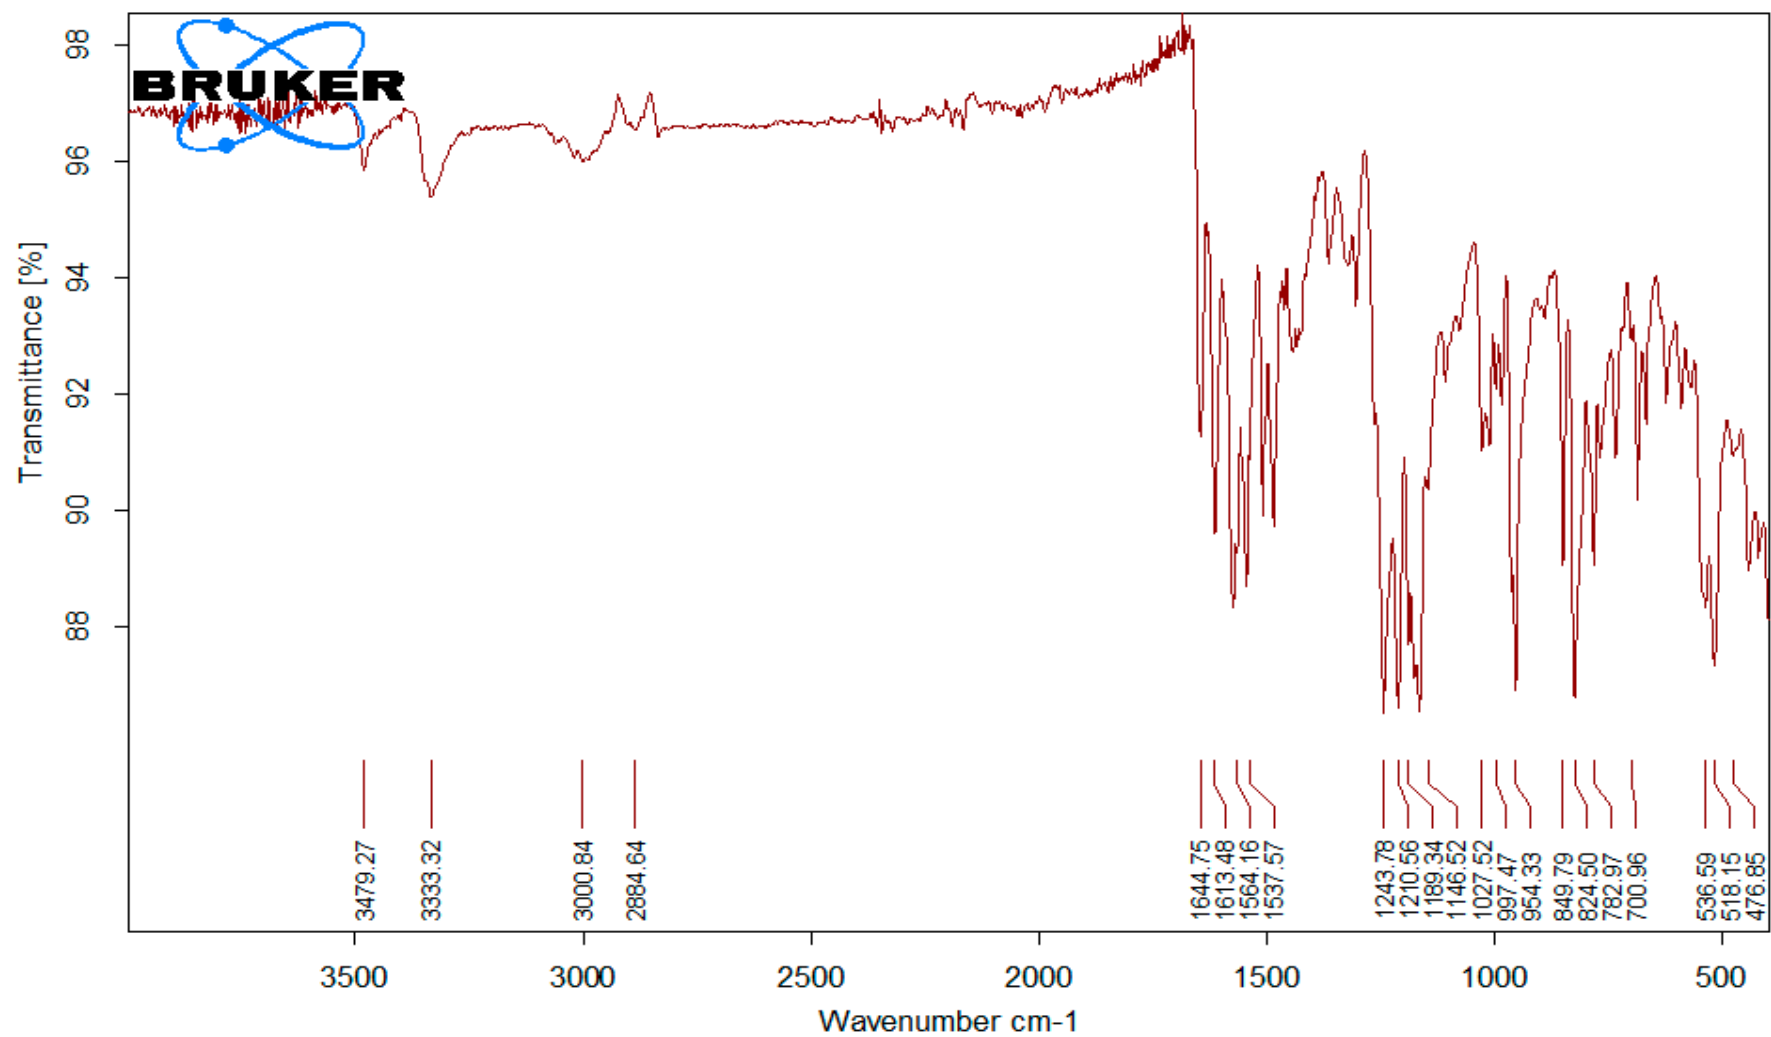

**Figure S2.8:** FT-IR spectrum of **3d**.

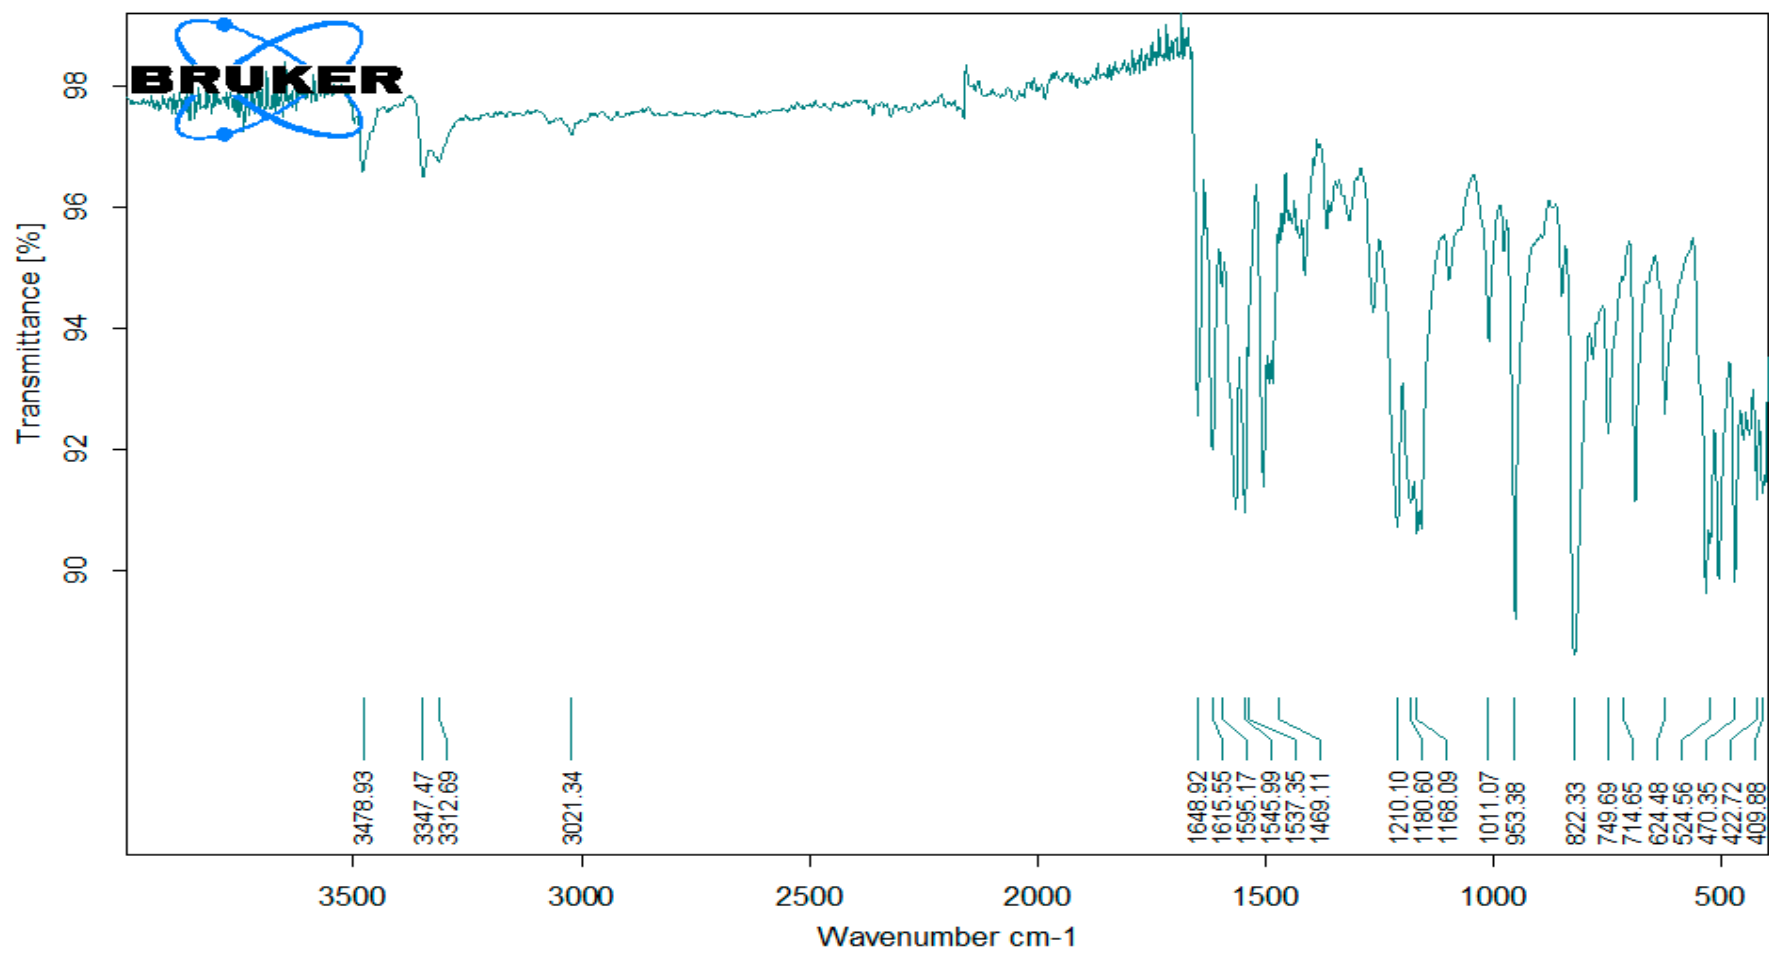

Figure S2.9: FT-IR spectrum of **3e**.

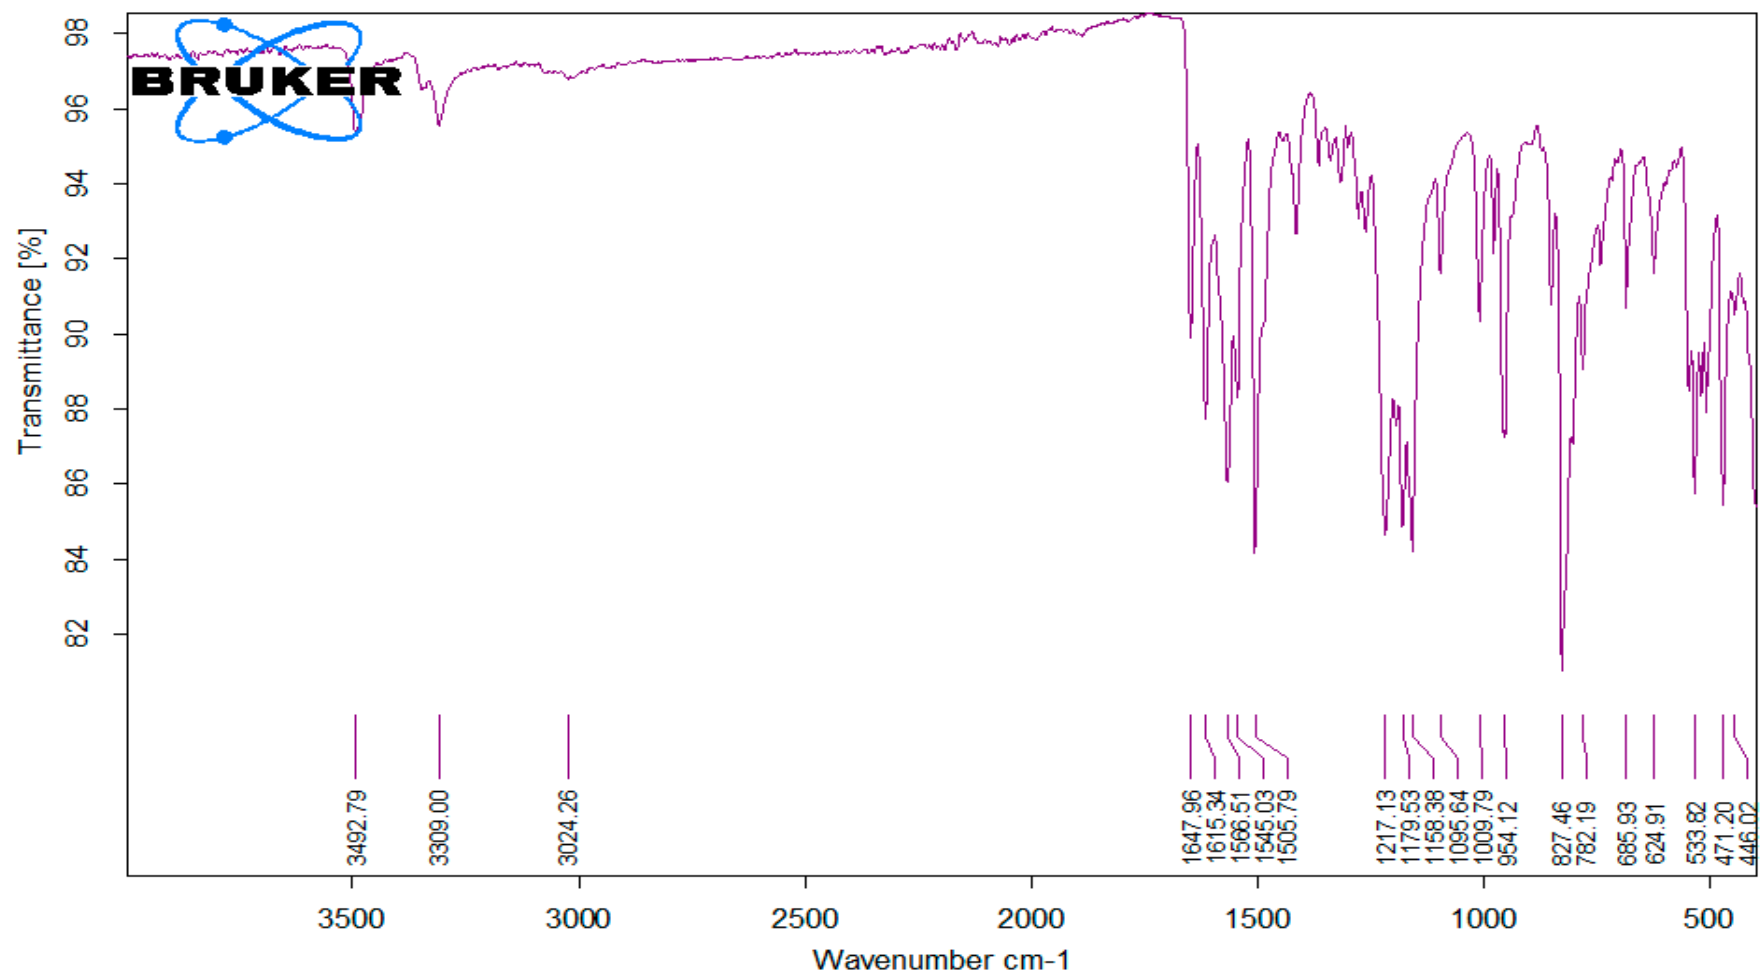

Figure S2.10: FT-IR spectrum of **3f**.



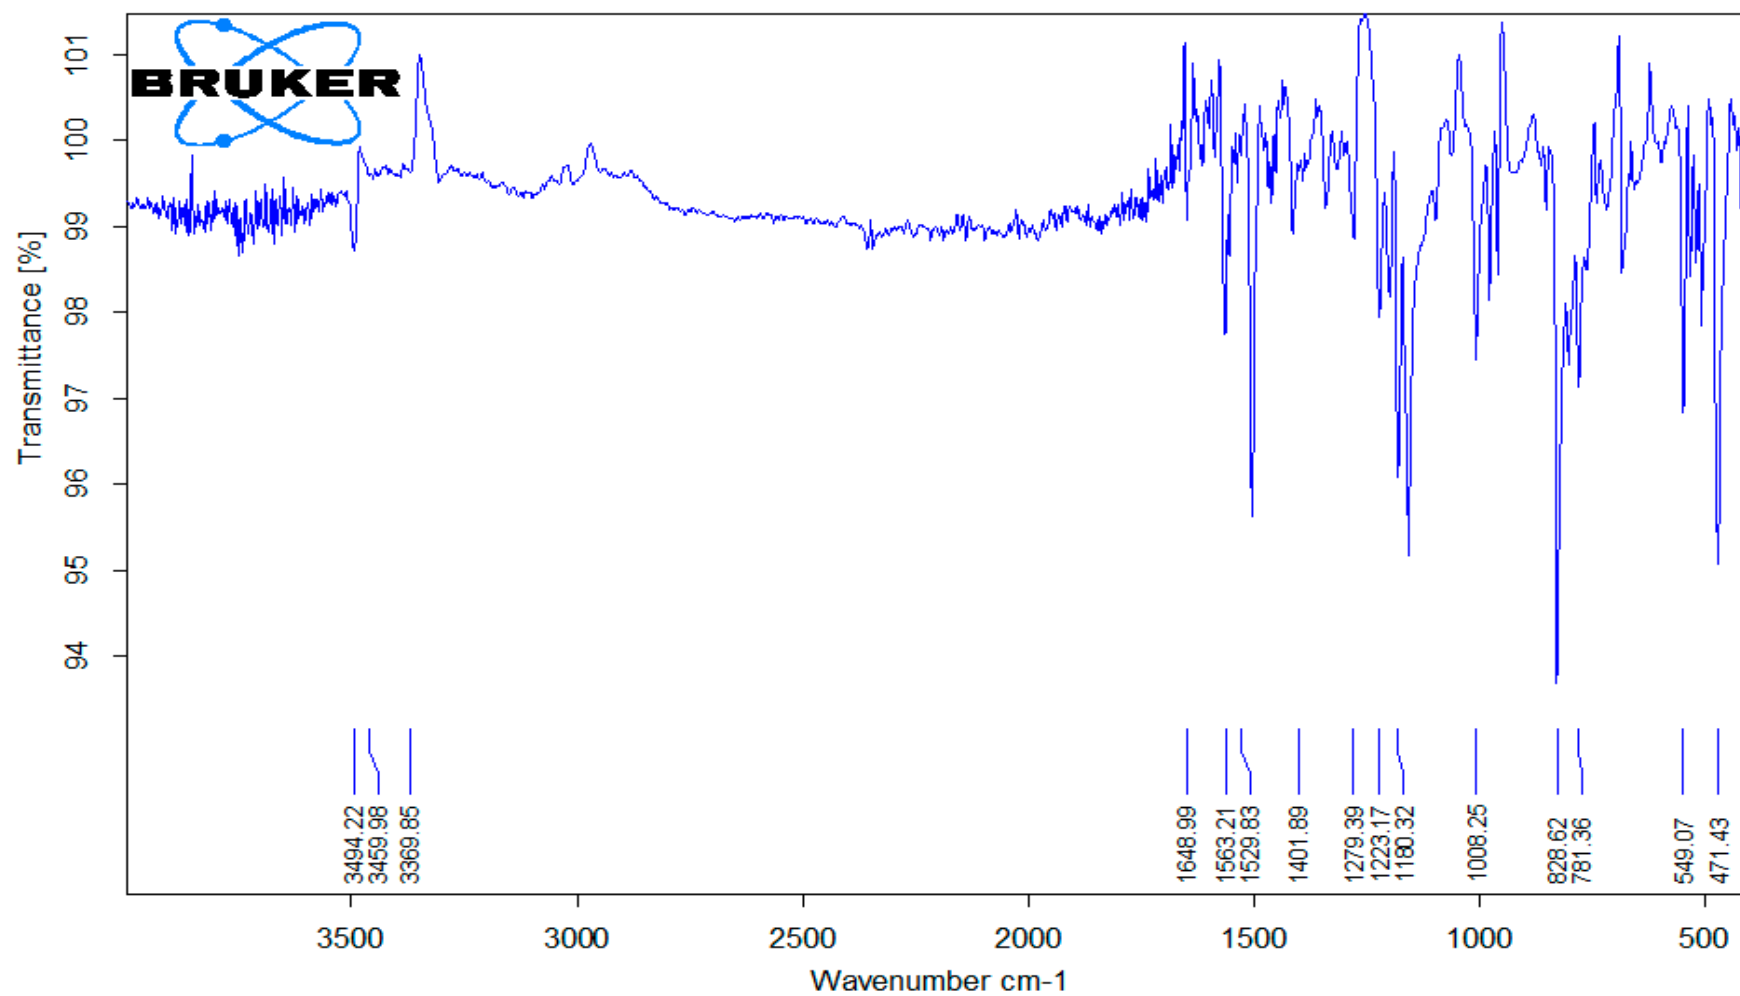

**Figure S2.11:** FT-IR spectrum of **3g**.

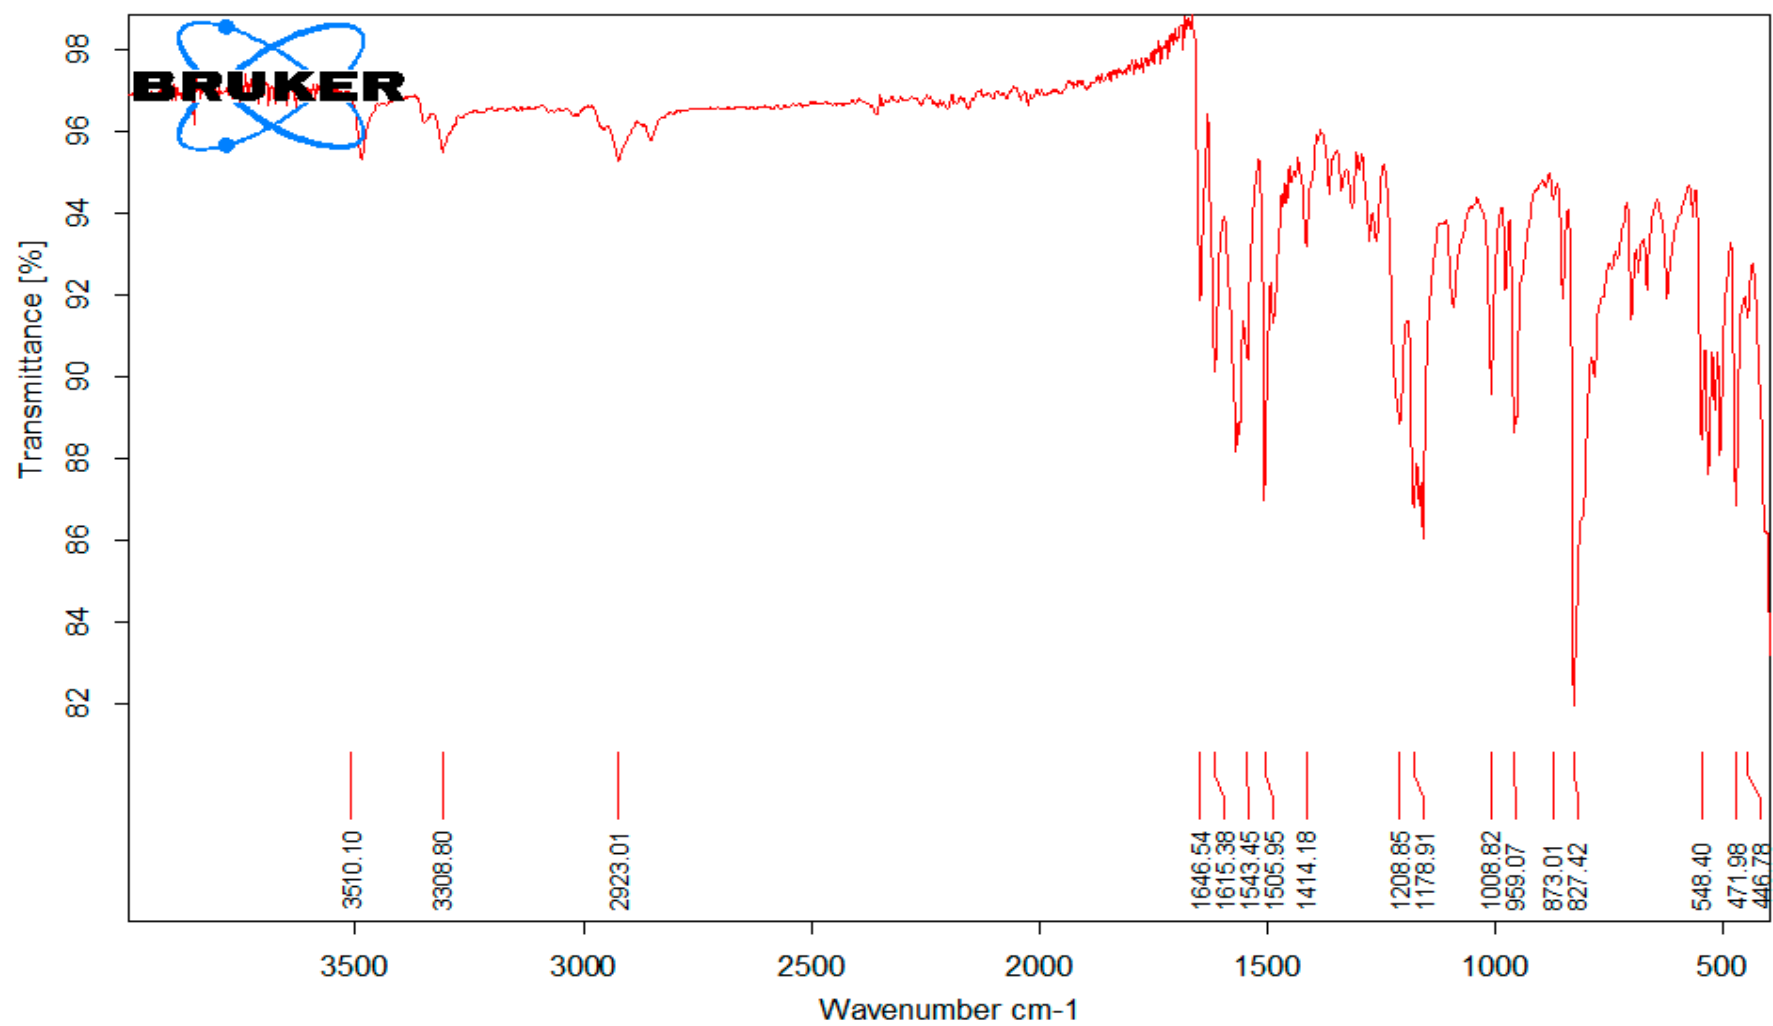

Figure S2.12: FT-IR spectrum of 3h.

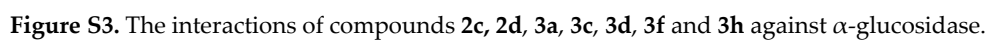

Supplement: s1 [file s1]
